# Supplementary material for: Label-Free Quantitative Analysis of Pig Liver Proteome after Hepatitis E Virus Infection
Source: MDPI journal article supplement (doi:10.3390/v16030408), 2024-03-06
Supplement: s1 [file s1]

Supplementary Table S3. Pathway Enrichment Analysis performed on differentially expressed proteins by using the web server SRplot.

| Pathway Description                         | pvalue      | p.adjust    | qvalue      | geneID                                                                                                                                                                                                                                                                                                    | Count |
|---------------------------------------------|-------------|-------------|-------------|-----------------------------------------------------------------------------------------------------------------------------------------------------------------------------------------------------------------------------------------------------------------------------------------------------------|-------|
| Carbon metabolism                           | 2,59897E-28 | 6,15956E-26 | 4,59607E-26 | CPS1, GLUD1, PC, PCCA, IDH2, PCCB, ACAT1, SUCLG2, MDH2, ACADS, CS, ACO1, DLD, FBPI, SHMT2, SUCLG1, GLDC, SDHA, MMUT, TALDO1, GLYCK, AMT, DLST, HIBCH, HAO2, ALDOA, ALDOC, GCSH, RGN, PSAT1, PGK1, GPI, CAT, GAPDH, PHGDH, IDH1, ENO1, ESD, ALDOB, GCK, PGD                                                | 41    |
| Ribosome                                    | 7,46256E-22 | 8,84314E-20 | 6,59848E-20 | RPL26L1, RPS3, RPLP0, RPSA, RPL7, RPS4X, RPS3A, RPL9, RPL7A, RPL18, RPL30, RPS8, RPL4, RPS19, RPL13A, RPL19, RPL5, RPS7, RPS9, RPL10A, RPL27A, RPS18, RPS25, RPL24, RPS23, RPL8, RPS13, RPL37A, RPS21, RPL10L, RPL36, RPL35A, RPL23, RPS24, RPL6, RPS11, RPS17, RPS10, RPL22, RPS12                       | 40    |
| Valine, leucine and isoleucine degradation  | 3,48906E-21 | 2,75636E-19 | 2,05671E-19 | ALDH2, PCCA, PCCB, AGXT2, ACAA2, EHHADH, ACADSB, HADHA, ACAT1, IVD, ACADM, HMGCS2, HADHB, ACADS, DLD, HADH, ABAT, ACAD8, HIBADH, MMUT, HMGCL, HIBCH, MCCC2, AOX1, AACS                                                                                                                                    | 25    |
| Glyoxylate and dicarboxylate metabolism     | 4,51301E-19 | 2,67396E-17 | 1,99522E-17 | PCCA, PCCB, ACAT1, MDH2, CS, ACO1, HOGA1, DLD, SHMT2, GLDC, MMUT, GLYCK, AMT, AFMID, HAO2, GCSH, GLUL, CAT, GRHPR                                                                                                                                                                                         | 19    |
| Coronavirus disease                         | 3,13475E-16 | 1,48587E-14 | 1,10871E-14 | RPL26L1, RPS3, RPLP0, RPSA, RPL7, RPS4X, RPS3A, RPL9, STAT1, RPL7A, RPL18, RPL30, RPS8, RPL4, RPS19, RPL13A, RPL19, RPL5, RPS7, RPS9, RPL10A, RPL27A, RPS18, RPS25, FGB, RPL24, RPS23, RPL8, RPS13, RPL37A, RPS21, RPL10L, RPL36, RPL35A, C8A, RPL23, RPS24, RPL6, RPS11, RPS17, RPS10, RPL22, RPS12, FGG | 44    |
| Glycine, serine and threonine metabolism    | 1,75568E-14 | 6,93492E-13 | 5,17463E-13 | DMGDH, SARDH, AGXT2, GATM, DLD, MAOB, SHMT2, GLDC, GCAT, GLYCK, AMT, CHDH, GCSH, BHMT, PSAT1, PHGDH, GRHPR, GAMT                                                                                                                                                                                          | 18    |
| Biosynthesis of cofactors                   | 2,42675E-14 | 8,21629E-13 | 6,13074E-13 | ALDH2, NADK2, AK2, MTHFD1, AK3, DLD, GUSB, SHMT2, UGT1A6, MAT1A, AFMID, RGN, KYNU, GSS, UGDH, HPD, PSAT1, EPRS1, ALAD, ASPDH, GPHN, MPI, GCLC, GMPPA, UMPS, IDO2, GMPBP, TPK1, PMM2, SPR, NME2                                                                                                            | 31    |
| Biosynthesis of amino acids                 | 8,43167E-14 | 2,49788E-12 | 1,86384E-12 | CPS1, PC, IDH2, OTC, CS, ACO1, SHMT2, TALDO1, MAT1A, ALDOA, ALDOC, ASS1, GLUL, ACY1, PSAT1, PGK1, GAPDH, PHGDH, IDH1, ENO1, ALDOB, ASL                                                                                                                                                                    | 22    |
| Tryptophan metabolism                       | 2,6632E-12  | 7,0131E-11  | 5,23296E-11 | ALDH2, EHHADH, HADHA, ACAT1, GCDH, DLD, MAOB, HADH, DLST, AFMID, AOX1, KYNU, ALDH8A1, CAT, DDC, IDO2, ACMSD                                                                                                                                                                                               | 17    |
| Propanoate metabolism                       | 1,0885E-11  | 2,58058E-10 | 1,92555E-10 | ACSS3, PCCA, PCCB, EHHADH, HADHA, SUCLG2, ACADS, LDHB, LDHB, DLD, ABAT, SUCLG1, MMUT, HIBCH                                                                                                                                                                                                               | 14    |
| Proteasome                                  | 2,377E-11   | 5,12134E-10 | 3,82139E-10 | PSMD7, PSMD2, PSMB5, PSMC2, PSMC1, PSMB7, PSMD8, PSMD3, PSMD13, PSMA4, PSMB4, PSMA5, PSMA2, PSMB1, PSMA3, PSMB3                                                                                                                                                                                           | 16    |
| Fatty acid degradation                      | 9,66808E-11 | 1,90945E-09 | 1,42477E-09 | ALDH2, ACAA2, EHHADH, ACADSB, ACSL1, HADHA, ACAT1, ACADM, HADHB, GCDH, ACADS, HADH, CPT2, EC1, ADH4                                                                                                                                                                                                       | 15    |
| Glycolysis / Gluconeogenesis                | 4,00754E-10 | 7,30605E-09 | 5,45155E-09 | ALDH2, PCK1, LDHB, LDHB, DLD, FBPI, ALDOA, ALDOC, PGK1, GPI, ADH4, GAPDH, PGM1, ENO1, ALDOB, GCK, GALT                                                                                                                                                                                                    | 17    |
| Citrate cycle (TCA cycle)                   | 7,46056E-10 | 1,26297E-08 | 9,42387E-09 | PC, PCK1, IDH2, SUCLG2, MDH2, CS, ACO1, DLD, SUCLG1, SDHA, DLST, IDH1                                                                                                                                                                                                                                     | 12    |
| Amino sugar and nucleotide sugar metabolism | 1,09443E-09 | 1,7292E-08  | 1,29027E-08 | UGDH, RENBP, GPI, GALE, GMDS, PGM1, MPI, GMPPA, NAGK, GMPBP, GALT, PMM2, UAP1L1, GCK, GNPD1                                                                                                                                                                                                               | 15    |
| Butanoate metabolism                        | 1,75386E-09 | 2,5979E-08  | 1,93848E-08 | EHHADH, HADHA, ACAT1, HMGCS2, ACADS, ALDH5A1, HADH, ABAT, BDH1, HMGCL, AACS                                                                                                                                                                                                                               | 11    |
| Biosynthesis of nucleotide sugars           | 2,33795E-09 | 3,25938E-08 | 2,43205E-08 | UGDH, GPI, GALE, GMDS, PGM1, MPI, GMPPA, NAGK, GMPBP, GALT, PMM2, UAP1L1, GCK                                                                                                                                                                                                                             | 13    |
| Fructose and mannose metabolism             | 2,89204E-09 | 3,80785E-08 | 2,8413E-08  | FBPI, ALDOA, ALDOC, ENOSF1, SORD, GMDS, MPI, GMPPA, KHK, ALDOB, GMPBP, PMM2                                                                                                                                                                                                                               | 12    |
| beta-Alanine metabolism                     | 4,3731E-09  | 5,45486E-08 | 4,07025E-08 | ALDH2, EHHADH, HADHA, ACADS, ABAT, HIBCH, DPYS, UPB1, DPYD, CARN1, CNPD2, CSAD                                                                                                                                                                                                                            | 12    |
| Peroxisome                                  | 1,36419E-08 | 1,61656E-07 | 1,20623E-07 | IDH2, EHHADH, ACSL1, PRDX1, DHRS4, PEGR, SOD2, ECH1, HMGCL, HAO2, LOC110255172, EPHX2, CAT, IDH1, PMVK, PRDX5, MVK, ACOX2                                                                                                                                                                                 | 18    |
| Cysteine and methionine metabolism          | 2,46221E-08 | 2,77879E-07 | 2,07344E-07 | AGXT2, TST, MDH2, LDHB, LDHB, MAT1A, BHMT, GSS, PSAT1, MTAP, BHMT2, ADI1, PHGDH, GCLC                                                                                                                                                                                                                     | 14    |
| Alanine, aspartate and glutamate metabolism | 3,82692E-08 | 4,12263E-07 | 3,07618E-07 | CPS1, GLUD1, AGXT2, ALDH4A1, ALDH5A1, ABAT, ASS1, GLUL, NIT2, ASL, PPAT, ASRGL1                                                                                                                                                                                                                           | 12    |
| Pyruvate metabolism                         | 1,28715E-07 | 1,32632E-06 | 9,89659E-07 | PC, ALDH2, PCK1, ACAT1, MDH2, LDHB, LDHB, DLD, LDHD, ADH4, GRHPR, HAGH                                                                                                                                                                                                                                    | 12    |
| Pentose phosphate pathway                   | 1,5859E-07  | 1,56607E-06 | 1,16855E-06 | FBPI, TALDO1, GLYCK, ALDOA, ALDOC, RGN, GPI, PGM1, ALDOB, PGD                                                                                                                                                                                                                                             | 10    |
| Fatty acid metabolism                       | 5,08058E-07 | 4,81639E-06 | 3,59384E-06 | ACAA2, EHHADH, ACADSB, ACSL1, HADHA, ACAT1, HSD17B8, ACADM, HADHB, ACADS, HADH, CPT2, FASN                                                                                                                                                                                                                | 13    |
| Arginine biosynthesis                       | 1,10135E-05 | 0,000100392 | 7,49097E-05 | CPS1, GLUD1, OTC, ASS1, GLUL, ACY1, ASL                                                                                                                                                                                                                                                                   | 7     |
| Spinocerebellar ataxia                      | 1,16196E-05 | 0,000101995 | 7,61052E-05 | SLC25A5, VDAC1, PSMD7, SLC25A6, PSMD2, PSMB5, PSMC2, PSMC1, PSMB7, PSMD8, PSMD3, PSMD13, PSMA4, PSMB4, PSMA5, PSMA2, PSMB1, PSMA3, PSMB3                                                                                                                                                                  | 19    |
| PPAR signaling pathway                      | 2,04098E-05 | 0,000172754 | 0,000128904 | PCK1, EHHADH, ACSL1, ACADM, HMGCS2, GK, CPT2, ILK, CYP27A1, APOC3, FABP4, DBI, ACOX2                                                                                                                                                                                                                      | 13    |
| Arginine and proline metabolism             | 4,39425E-05 | 0,000359116 | 0,000267962 | ALDH2, GATM, ALDH4A1, HOGA1, MAOB, LAP3, CARN1, GAMT, CNPD2, L3HYDPH                                                                                                                                                                                                                                      | 10    |
| Parkinson disease                           | 6,37822E-05 | 0,000490694 | 0,00036614  | ATP5F1B, ATP5F1A, SLC25A5, MAOB, HSPA5, SDHA, VDAC1, PSMD7, SLC25A6, ATP5F1C, PSMD2, PSMB5, PSMC2, PSMC1, PSMB7, PSMD8, PSMD3, PSMD13, UBE2L3, PSMA4, PSMB4, PSMA5, PSMA2, PSMB1, PSMA3, PSMB3                                                                                                            | 26    |

|                                                   |             |             |             |                                                                                                                                                                                                                                          |    |
|---------------------------------------------------|-------------|-------------|-------------|------------------------------------------------------------------------------------------------------------------------------------------------------------------------------------------------------------------------------------------|----|
| Amyotrophic lateral sclerosis                     | 6,47182E-05 | 0,000490694 | 0,00036614  | ATP5F1B, ATP5F1A, HSPA5, HNRNPA2B1, SDHA, VDAC1, HNRNPA1, SEC13, HNRNPA3, PSMD7, MATR3, ATP5F1C, UBQLN1, DCTN2, VCP, CAT, PSMD2, PSMB5, PSMC2, PSMC1, PSMB7, PSMD8, PSMD3, PSMD13, PSMA4, PSMB4, PSMA5, PSMA2, PSMB1, PFN1, PSMA3, PSMB3 | 32 |
| One carbon pool by folate                         | 6,6254E-05  | 0,000490694 | 0,00036614  | MTHFD1, SHMT2, GART, AMT, ATIC, MTHFR                                                                                                                                                                                                    | 6  |
| Pentose and glucuronate interconversions          | 7,49766E-05 | 0,000538468 | 0,000401788 | GUSB, UGT1A6, UGDH, SORD, DHDH, CRYL1, FGGY                                                                                                                                                                                              | 7  |
| Drug metabolism - other enzymes                   | 8,8446E-05  | 0,000616521 | 0,000460029 | GUSB, CES1, UGT1A6, GSTM3, DPY5, UPB1, DPYD, HPRT1, GSTO1, UMP5, NME2                                                                                                                                                                    | 11 |
| Tyrosine metabolism                               | 0,000124795 | 0,000845042 | 0,000630544 | MAOB, AOX1, HPD, COMT, ADH4, DDC, HGD, GSTZ1                                                                                                                                                                                             | 8  |
| Prion disease                                     | 0,000220318 | 0,001450425 | 0,001082262 | ATP5F1B, ATP5F1A, SLC25A5, HSPA5, SDHA, VDAC1, PSMD7, SLC25A6, ATP5F1C, C8A, PSMD2, PSMB5, PSMC2, PSMC1, PSMB7, PSMD8, PSMD3, PSMD13, PSMA4, PSMB4, PSMA5, PSMA2, PSMB1, PSMA3, PSMB3                                                    | 25 |
| Histidine metabolism                              | 0,000230577 | 0,001476939 | 0,001102047 | ALDH2, MAOB, CARNS1, HAL, CNDP2, HNMT                                                                                                                                                                                                    | 6  |
| Huntington disease                                | 0,000254274 | 0,001585866 | 0,001183324 | ATP5F1B, CLTC, ATP5F1A, SLC25A5, SOD2, SDHA, VDAC1, PSMD7, SLC25A6, ATP5F1C, DCTN2, AP2B1, PSMD2, PSMB5, PSMC2, PSMC1, PSMB7, PSMD8, PSMD3, PSMD13, PSMA4, PSMB4, PSMA5, PSMA2, PSMB1, PSMA3, PSMB3                                      | 27 |
| Lysine degradation                                | 0,000279562 | 0,001698878 | 0,001267651 | ALDH2, EHHADH, HADHA, ACAT1, GCDH, DLD, HADH, AASS, DLST, BBOX1                                                                                                                                                                          | 10 |
| Bacterial invasion of epithelial cells            | 0,000362656 | 0,002148735 | 0,00160332  | VCL, CLTC, ILK, SEPTIN2, SEPTIN11, ARPC1B, ARPC5, ACTR2, ARPC1A, FN1, CDC42                                                                                                                                                              | 11 |
| Glutathione metabolism                            | 0,000584685 | 0,003379766 | 0,002521877 | IDH2, GSTM3, LAP3, GSS, GSR, GCLC, IDH1, GSTO1, PGD                                                                                                                                                                                      | 9  |
| 2-Oxocarboxylic acid metabolism                   | 0,000715466 | 0,004037275 | 0,00301249  | IDH2, CS, ACO1, ACY1, IDH1                                                                                                                                                                                                               | 5  |
| Steroid hormone biosynthesis                      | 0,001230385 | 0,006781424 | 0,00506009  | HSD17B8, UGT1A6, CYP3A46, AKR1D1, COMT, CYP2D25, AKR1C1, CYP2C49, CYP3A22                                                                                                                                                                | 9  |
| Galactose metabolism                              | 0,001648388 | 0,008878816 | 0,006625099 | GALE, PGM1, GAA, GALT, GCK, GALT                                                                                                                                                                                                         | 6  |
| Ferroptosis                                       | 0,001715596 | 0,009035473 | 0,006741992 | ACSL1, GSS, TE, TE, GCLC, FTH1, FTL                                                                                                                                                                                                      | 7  |
| Pantothenate and CoA biosynthesis                 | 0,001912467 | 0,009643717 | 0,007195844 | ALDH2, DPY5, UPB1, DPYD, CSAD                                                                                                                                                                                                            | 5  |
| Terpenoid backbone biosynthesis                   | 0,001912467 | 0,009643717 | 0,007195844 | ACAT1, HMGCS2, FDPS, PMVK, MVK                                                                                                                                                                                                           | 5  |
| Metabolism of xenobiotics by cytochrome P450      | 0,002856752 | 0,013647984 | 0,010183706 | UGT1A6, GSTM3, CBR1, ADH4, SULT2A1, DHDH, AKR7A2, GSTO1                                                                                                                                                                                  | 8  |
| Chemical carcinogenesis - DNA adducts             | 0,002856752 | 0,013647984 | 0,010183706 | UGT1A6, CYP3A46, GSTM3, CBR1, SULT2A1, GSTO1, CYP2C49, CYP3A22                                                                                                                                                                           | 8  |
| Ascorbate and aldarate metabolism                 | 0,002879322 | 0,013647984 | 0,010183706 | ALDH2, GUSB, UGT1A6, RGN, UGDH                                                                                                                                                                                                           | 5  |
| Purine metabolism                                 | 0,003111408 | 0,014458895 | 0,010788783 | AK2, AK3, GART, UOX, ADK, PGM1, HPRT1, ATIC, GMPR2, PPAT, GMPR, NUDT9, NME2                                                                                                                                                              | 13 |
| Nicotinate and nicotinamide metabolism            | 0,003649597 | 0,01663374  | 0,012411585 | NADK2, NNT, AOX1, ASPDH, NAMPT, NMRK1                                                                                                                                                                                                    | 6  |
| Nitrogen metabolism                               | 0,003824136 | 0,017100382 | 0,012759779 | CPS1, GLUD1, GLUL, CA3                                                                                                                                                                                                                   | 4  |
| Primary bile acid biosynthesis                    | 0,006013473 | 0,026392464 | 0,019693244 | CYP27A1, LOC110255172, AKR1D1, ACOX2                                                                                                                                                                                                     | 4  |
| Retinol metabolism                                | 0,006995559 | 0,029606205 | 0,022091239 | DHRS4, UGT1A6, CYP3A46, AOX1, RDH8, ADH4, CYP2C49, CYP3A22                                                                                                                                                                               | 8  |
| Aminoacyl-tRNA biosynthesis                       | 0,006995559 | 0,029606205 | 0,022091239 | KARS1, RARS1, YARS1, EPRS1, TARSL, HARS1, IARS1, NARS1                                                                                                                                                                                   | 8  |
| Folate biosynthesis                               | 0,009033677 | 0,037561076 | 0,028026919 | CBR1, GPHN, AKR1C1, QDPR, SPR                                                                                                                                                                                                            | 5  |
| HIF-1 signaling pathway                           | 0,0167823   | 0,068575952 | 0,051169265 | LDHB, LDHB, ALDOA, ALDOC, PGK1, GAPDH, TE, TE, ENO1, ALDOB                                                                                                                                                                               | 10 |
| Nucleotide metabolism                             | 0,022185206 | 0,088987257 | 0,066399552 | AK2, AK3, ADK, HPRT1, ASMTL, GMPR2, GMPR, NME2                                                                                                                                                                                           | 8  |
| Fatty acid elongation                             | 0,02252842  | 0,088987257 | 0,066399552 | ACAA2, HADHA, HADHB, HADH                                                                                                                                                                                                                | 4  |
| Thiamine metabolism                               | 0,023384491 | 0,090315977 | 0,067391002 | AK2, TPK1, ACP1                                                                                                                                                                                                                          | 3  |
| Drug metabolism - cytochrome P450                 | 0,023626965 | 0,090315977 | 0,067391002 | MAOB, UGT1A6, GSTM3, AOX1, ADH4, GSTO1                                                                                                                                                                                                   | 6  |
| Pyrimidine metabolism                             | 0,027822699 | 0,104666344 | 0,078098804 | DPY5, UPB1, DPYD, UMP5, ASMTL, NME2                                                                                                                                                                                                      | 6  |
| Chemical carcinogenesis - reactive oxygen species | 0,031191637 | 0,115506529 | 0,086187417 | ATP5F1B, ATP5F1A, SLC25A5, SOD2, SDHA, VDAC1, GSTM3, SLC25A6, ATP5F1C, CBR1, EPHX2, CAT, AKR1C1, GSTO1, AS3MT, ACP1                                                                                                                      | 16 |
| Regulation of actin cytoskeleton                  | 0,03230005  | 0,117770951 | 0,087877059 | VCL, ACTN1, MSN, RDX, KNG1, ARPC1B, C8A, ARPC5, DIAPH1, ACTR2, PPP1CA, ARPC1A, CFL2, FN1, PFN1, CDC42                                                                                                                                    | 16 |
| Alzheimer disease                                 | 0,035421404 | 0,127195042 | 0,094909025 | ATP5F1B, ATP5F1A, SLC25A5, SDHA, VDAC1, PSMD7, SLC25A6, ATP5F1C, GAPDH, PSMD2, PSMB5, PSMC2, PSMC1, PSMB7, PSMD8, PSMD3, PSMD13, PSMA4, PSMB4, PSMA5, PSMA2, PSMB1, PSMA3, PSMB3                                                         | 24 |
| Fatty acid biosynthesis                           | 0,038205709 | 0,135145567 | 0,100841462 | ACSL1, HSD17B8, FASN                                                                                                                                                                                                                     | 3  |
| Antifolate resistance                             | 0,044506897 | 0,155119626 | 0,11574549  | SHMT2, GART, ATIC, MTHFR                                                                                                                                                                                                                 | 4  |
| Pathways of neurodegeneration - multiple diseases | 0,045249934 | 0,155423687 | 0,115972372 | ATP5F1B, ATP5F1A, SLC25A5, HSPA5, SDHA, VDAC1, PSMD7, SLC25A6, ATP5F1C, DCTN2, VCP, CAT, PSMD2, PSMB5, PSMC2, PSMC1, PSMB7, PSMD8, PSMD3, PSMD13, UBE2L3, PSMA4, PSMB4, PSMA5, PSMA2, PSMB1, PSMA3, PSMB3                                | 28 |
