# Supplementary material for: Label-Free Quantitative Analysis of Pig Liver Proteome after Hepatitis E Virus Infection
Source: MDPI journal article supplement (doi:10.3390/v16030408), 2024-03-06
Supplement: s1 [file s1]

**Supplementary Table S2.** Proteins identified with greater abundance in samples obtained from pigs that resulted negative to the ELISA evaluation (NG) following label-free MS/MS analysis (Progenesis QI for proteomics).

| UniProt ID <sup>1</sup> | Gene name    | Protein Description                                    | Peptide <sup>2</sup> | Score <sup>3</sup> | Anova (p) | Fold change |
|-------------------------|--------------|--------------------------------------------------------|----------------------|--------------------|-----------|-------------|
| Q58GK8                  | FASN         | fatty acid synthase                                    | 24                   | 124.48             | 0.0194    | 1.82        |
| Q95332                  | BHMT         | betaine-homocysteine S-methyltransferase 1             | 19                   | 140.67             | 0.0003    | 1.78        |
| L7TEV7                  | AOX1         | aldehyde oxidase                                       | 18                   | 91.88              | 0.0072    | 2.06        |
| F1S1E7                  | DPYS         | dihydropyrimidinase isoform X1                         | 17                   | 108.90             | 0.0015    | 1.86        |
| A0A4X1VFQ7              | LOC110255172 | acyl-coenzyme A amino acid N-acyltransferase 2-like    | 17                   | 93.37              | 0.0078    | 1.75        |
| A0A480ST43              | ASS1         | argininosuccinate synthase                             | 16                   | 97.76              | 0.0015    | 1.66        |
| F1S3H8                  | RDH8         | retinol dehydrogenase 1                                | 16                   | 76.58              | 0.0276    | 1.54        |
| A0A4X1UZ96              | UPB1         | beta-ureidopropionase                                  | 16                   | 94.43              | 0.0086    | 1.98        |
| P23687                  | PREP         | prolyl endopeptidase                                   | 16                   | 71.89              | 0.0139    | 2.11        |
| Q28943                  | DPYD         | dihydropyrimidine dehydrogenase [NADP(+)] precursor    | 15                   | 67.95              | 0.0017    | 1.98        |
| Q06AA3                  | RGN          | regucalcin                                             | 14                   | 94.49              | 0.0034    | 1.71        |
| A0A5G2QAG3              | LAP3         | cytosol aminopeptidase isoform X1                      | 14                   | 79.04              | 0.0016    | 1.78        |
| P46410                  | GLUL         | glutamine synthetase isoform X1                        | 13                   | 70.53              | 0.0008    | 3.78        |
| A0A480R4L3              | KYNU         | kynureninase isoform X1                                | 13                   | 50.36              | 0.0008    | 2.24        |
| A0A286ZZN9              | GLMS         | glutamine-fructose-6-phosphate aminotransferase 1      | 13                   | 58.72              | 0.0000    | 2.19        |
| P37111                  | ACY1         | aminoacylase-1                                         | 12                   | 86.53              | 0.0009    | 2.34        |
| Q6Q2C2                  | EPHX2        | bifunctional epoxide hydrolase 2                       | 12                   | 54.89              | 0.0174    | 1.66        |
| A0A286ZRS0              | GSS          | glutathione synthetase                                 | 11                   | 44.56              | 0.0071    | 1.91        |
| P28839                  | LAP3         | xaa-Pro dipeptidase                                    | 11                   | 48.18              | 0.0023    | 2.64        |
| A0A4X1TBE8              | GSTM3        | glutathione S-transferase                              | 11                   | 49.20              | 0.0023    | 1.72        |
| I3L804                  | YARS1        | tyrosine-tRNA ligase, cytoplasmic isoform X1           | 11                   | 41.54              | 0.0005    | 2.35        |
| I3LIM2                  | UGDH         | UDP-glucose 6-dehydrogenase                            | 11                   | 45.24              | 0.0098    | 1.82        |
| Q02110                  | HPD          | 4-hydroxyphenylpyruvate dioxygenase                    | 11                   | 55.49              | 0.0033    | 1.65        |
| D2SW95                  | COPB1        | coatamer subunit beta                                  | 11                   | 40.14              | 0.0082    | 1.67        |
| A0A8D0YFM9              | GSR          | glutathione reductase, mitochondrial                   | 10                   | 58.65              | 0.0093    | 1.98        |
| A0A480NMC5              | DPP3         | dipeptidyl peptidase 3 isoform X1                      | 10                   | 53.31              | 0.0009    | 2.71        |
| O97788                  | FABP4        | fatty acid-binding protein                             | 10                   | 54.41              | 0.0011    | 1.67        |
| A0A4X1TZD5              | EEF1A        | elongation factor 1-alpha 1                            | 10                   | 61.46              | 0.0008    | 2.28        |
| P03974                  | VCP          | transitional endoplasmic reticulum ATPase              | 10                   | 45.68              | 0.0014    | 2.04        |
| F1SNJ5                  | AKR1D1       | 3-oxo-5-beta-steroid 4-dehydrogenase isoform X1        | 10                   | 52.58              | 0.0026    | 1.75        |
| F1SIJ9                  | PSAT1        | phosphoserine aminotransferase                         | 10                   | 59.02              | 0.0008    | 1.63        |
| F1S9K5                  | EPRS1        | bifunctional glutamate/proline--tRNA ligase isoform X1 | 9                    | 41.69              | 0.0451    | 2.18        |
| K9IVR7                  | WDR1         | WD repeat-containing protein 1                         | 9                    | 67.88              | 0.0366    | 2.38        |
| Q99028                  | COMT         | catechol O-methyltransferase                           | 9                    | 78.39              | 0.0053    | 1.82        |
| A0A480TVJ2              | MAN2C1       | alpha-mannosidase 2C1 isoform X2                       | 9                    | 38.14              | 0.0021    | 6.66        |
| A0A8D0TR45              | PTER         | phosphotriesterase-related protein isoform X1          | 9                    | 52.76              | 0.0000    | 1.99        |
| Q7SIB7                  | PGK1         | phosphoglycerate kinase 1                              | 9                    | 51.09              | 0.0007    | 1.60        |

|            |              |                                                                    |   |       |        |       |
|------------|--------------|--------------------------------------------------------------------|---|-------|--------|-------|
| A0A287BBJ7 | ALDH33A      | alcohol dehydrogenase class-3                                      | 9 | 45.44 | 0.0002 | 1.65  |
| A0A480Y1M9 | XPNPEP1      | xaa-Pro aminopeptidase 1 isoform X1                                | 9 | 34.78 | 0.0003 | 1.86  |
| F1RUY9     | CARNS1       | carnosine synthase 1 isoform X1                                    | 9 | 38.58 | 0.0072 | 2.22  |
| A0A287AWU9 | ENOSF1       | enolase superfamily member 1                                       | 9 | 48.55 | 0.0001 | 1.95  |
| P10775     | RNH1         | ribonuclease inhibitor isoform X1                                  | 9 | 42.75 | 0.0011 | 2.11  |
| F1RLI9     | SHPK         | sedoheptulokinase                                                  | 8 | 48.63 | 0.0015 | 2.23  |
| A0A8W4F7Z7 | ABHD14B      | protein ABHD14B                                                    | 8 | 46.33 | 0.0379 | 1.63  |
| A0A287BGW4 | ALAD         | delta-aminolevulinic acid dehydratase                              | 8 | 43.06 | 0.0131 | 2.31  |
| P17560     | RENBP        | N-acylglucosamine 2-epimerase                                      | 8 | 39.24 | 0.0037 | 2.77  |
| A0A480UBN5 | MTAP         | S-methyl-5'-thioadenosine phosphorylase                            | 8 | 37.02 | 0.0001 | 1.74  |
| A0A481BBL3 | ALDH8A1      | aldehyde dehydrogenase family                                      | 8 | 33.72 | 0.0150 | 2.02  |
| A0A287ABJ0 | BHMT2        | S-methylmethionine--homocysteine S-methyltransferase BHMT2         | 8 | 48.89 | 0.0000 | 1.58  |
| P08059     | GPI          | glucose-6-phosphate isomerase                                      | 8 | 53.26 | 0.0025 | 2.43  |
| A0A8D0QAZ7 | BLMH         | bleomycin hydrolase                                                | 8 | 36.83 | 0.0010 | 2.01  |
| A0A287BBK0 | DDAH1        | N(G),N(G)-dimethylarginine dimethylaminohydrolase 1                | 8 | 39.94 | 0.0001 | 1.77  |
| A0A480STU2 | LHPP         | phospholysine phosphohistidine inorganic pyrophosphate phosphatase | 7 | 46.60 | 0.0001 | 2.71  |
| A0A287BIW1 | GALE         | UDP-glucose 4-epimerase                                            | 7 | 33.62 | 0.0112 | 1.85  |
| A0A4X1VDX2 | SORD         | sorbitol dehydrogenase                                             | 7 | 39.66 | 0.0080 | 1.64  |
| O62839     | CAT          | catalase                                                           | 7 | 57.81 | 0.0325 | 1.69  |
| P51781     | GST          | glutathione S-transferase alpha M14                                | 7 | 37.13 | 0.0464 | 1.54  |
| A0A480RXC8 | AARS         | alanine-tRNA ligase, cytoplasmic                                   | 7 | 34.63 | 0.0002 | 3.04  |
| A0A480JL46 | GLOD4        | glyoxalase domain-containing protein 4                             | 7 | 27.13 | 0.0004 | 1.72  |
| A0A480VV97 | CMBL         | carboxymethylenebutenolidase homolog                               | 7 | 30.83 | 0.0096 | 2.04  |
| A0A8W4FEH1 | SEC14L3      | SEC14-like protein 3 isoform X1                                    | 7 | 47.85 | 0.0144 | 1.90  |
| F1S0Y8     | ADH4         | all-trans-retinol dehydrogenase [NAD(+)] ADH4                      | 7 | 79.78 | 0.0026 | 2.73  |
| A0A8D0XGZ4 | LOC100737183 | cytosolic beta-glucosidase                                         | 7 | 26.77 | 0.0104 | 1.91  |
| A0A8D1SKK2 | ASPDH        | aspartate dehydrogenase domain-containing protein                  | 7 | 27.26 | 0.0111 | 1.81  |
| A0A8D1GC64 | ADI1         | acireductone dioxygenase                                           | 7 | 29.63 | 0.0002 | 2.26  |
| A0A287AFJ9 | GPHN         | gephyrin                                                           | 7 | 28.24 | 0.0001 | 2.15  |
| A0A8D0YP96 | SEC14L2      | SEC14-like protein 2                                               | 7 | 40.27 | 0.0020 | 2.34  |
| A0A287ASQ2 | ADK          | adenosine kinase                                                   | 7 | 30.38 | 0.0083 | 1.83  |
| F1RX12     | GMDS         | GDP-mannose 4,6 dehydratase                                        | 6 | 41.57 | 0.0016 | 1.68  |
| A0A8D1TDT7 | DIAPH1       | protein diaphanous homolog 1 isoform X2                            | 6 | 28.57 | 0.0000 | 3.17  |
| P00355     | GAPDH        | glyceraldehyde-3-phosphate dehydrogenase                           | 6 | 41.58 | 0.0140 | 18.99 |
| A0A287ARN4 | PGM1         | phosphoglucomutase-1                                               | 6 | 37.77 | 0.0480 | 1.64  |
| A0A5G2QYS6 | GPD1L        | glycerol-3-phosphate dehydrogenase 1-like protein                  | 6 | 26.22 | 0.0032 | 2.31  |
| F1SJ30     | MPI          | mannose-6-phosphate isomerase                                      | 6 | 26.04 | 0.0119 | 2.39  |
| F1SQR7     | HAL          | histidine ammonia-lyase                                            | 6 | 29.63 | 0.0017 | 2.19  |
| D0G776     | LTA4H        | leukotriene A-4 hydrolase                                          | 6 | 35.39 | 0.0322 | 2.15  |
| I3LHC8     | BDH2         | 3-hydroxybutyrate dehydrogenase type 2                             | 6 | 26.59 | 0.0082 | 1.74  |
| A0A286ZTC2 | PBLD         | phenazine biosynthesis-like domain-containing protein isoform X1   | 6 | 39.40 | 0.0011 | 1.66  |

|            |              |                                                        |   |       |        |      |
|------------|--------------|--------------------------------------------------------|---|-------|--------|------|
| A0A480PP18 | PHGDH        | D-3-phosphoglycerate dehydrogenase                     | 6 | 22.34 | 0.0175 | 1.85 |
| A0A8D1RFQ4 | TF           | serotransferrin precursor                              | 6 | 24.64 | 0.0073 | 2.39 |
| A0A8D0IHP8 | GRHPR        | glyoxylate reductase/hydroxypyruvate reductase         | 6 | 26.47 | 0.0018 | 1.96 |
| A0A4X1VU35 | GAMT         | guanidinoacetate N-methyltransferase isoform X2        | 6 | 38.54 | 0.0011 | 2.38 |
| P82125     | AKR1E2       | aldo-keto reductase family 1 member C1                 | 6 | 28.42 | 0.0012 | 1.74 |
| A0A4X1ULZ8 | GCLC         | glutamate-cysteine ligase catalytic subunit isoform X1 | 6 | 23.69 | 0.0180 | 1.67 |
| O46658     | CYP2D25      | vitamin D(3) 25-hydroxylase                            | 6 | 36.98 | 0.0354 | 2.22 |
| A0A480ZBJ4 | NDRG2        | protein NDRG2 isoform X1                               | 6 | 38.92 | 0.0053 | 2.38 |
| A0A480V890 | TTC38        | tetratricopeptide repeat protein 38                    | 6 | 26.90 | 0.0239 | 1.88 |
| A0A8D0IC03 | GMPPA        | mannose-1-phosphate guanylttransferase alpha           | 5 | 19.38 | 0.0003 | 2.39 |
| A0A8D1PJN0 | TARS1        | threonine--tRNA ligase, cytoplasmic                    | 5 | 16.47 | 0.0001 | 2.16 |
| A0A8D1MDA2 | GAA          | lysosomal alpha-glucosidase                            | 5 | 19.92 | 0.0069 | 2.41 |
| A0A286ZPY1 | AHNAK        | neuroblast differentiation-associated protein AHNAK    | 5 | 20.47 | 0.0028 | 3.85 |
| Q6QAR9     | NPEPPS       | puromycin-sensitive aminopeptidase                     | 5 | 15.88 | 0.0001 | 2.51 |
| F1RX88     | LOC100152150 | amine sulfotransferase-like isoform X1                 | 5 | 26.83 | 0.0008 | 2.92 |
| A0A8D1XB74 | DDC          | aromatic-L-amino-acid decarboxylase                    | 5 | 22.37 | 0.0005 | 1.82 |
| A0A480MFV9 | KTN1         | kinectin                                               | 5 | 17.19 | 0.0102 | 2.92 |
| Q3S3F7     | SULT2A1      | sulfotransferase 2A1                                   | 5 | 19.17 | 0.0007 | 2.06 |
| P12026     | DBI          | acyl-CoA-binding protein                               | 5 | 34.33 | 0.0006 | 1.92 |
| F1SBB0     | OSBPL1A      | oxysterol-binding protein-related protein 1            | 5 | 19.66 | 0.0054 | 1.75 |
| A0A480JRT9 | PSMD2        | 26S proteasome non-ATPase regulatory subunit 2         | 5 | 16.53 | 0.0389 | 1.51 |
| A0A480KE10 | NAGK         | N-acetyl-D-glucosamine kinase                          | 5 | 18.05 | 0.0151 | 1.87 |
| A0A287B8R2 | NUDC         | nuclear migration protein nudC                         | 5 | 16.39 | 0.0027 | 2.51 |
| A0A5G2QFH3 | KHK          | ketoheokinase                                          | 5 | 41.10 | 0.0011 | 1.76 |
| A0A480YJR0 | AKR1C1       | aldo-keto reductase family 1 member C1                 | 5 | 33.28 | 0.0124 | 2.03 |
| Q9TV69     | DHDH         | trans-1,2-dihydrobenzene-1,2-diol dehydrogenase        | 5 | 27.66 | 0.0104 | 1.70 |
| F1SKY2     | NIT2         | omega-amidase NIT2 isoform X1                          | 5 | 20.05 | 0.0076 | 1.79 |
| P20304     | IDH1         | isocitrate dehydrogenase [NADP] cytoplasmic isoform X1 | 5 | 30.65 | 0.0324 | 1.71 |
| D0G6X4     | FDPS         | farnesyl pyrophosphate synthase                        | 5 | 33.38 | 0.0066 | 1.70 |
| F1SUP1     | AKR7A2       | aflatoxin B1 aldehyde reductase member 2               | 5 | 24.41 | 0.0090 | 2.12 |
| Q45FY6     | HPRT1        | hypoxanthine-guanine phosphoribosyltransferase         | 5 | 28.62 | 0.0023 | 1.98 |
| Q9N1F5     | GSTO1        | glutathione S-transferase omega-1                      | 5 | 28.58 | 0.0053 | 1.69 |
| Q52I78     | NAMPT        | nicotinate phosphoribosyltransferase                   | 5 | 31.34 | 0.0009 | 1.54 |
| A0A480KQF0 | CARKD        | ATP-dependent (S)-NAD(P)H-hydrate dehydratase          | 5 | 16.09 | 0.0003 | 2.57 |
| A0A4X1V3T5 | PSMB5        | proteasome subunit beta type-5                         | 5 | 26.25 | 0.0004 | 2.43 |
| A0A287BI79 | PLS1         | plastin-1                                              | 5 | 18.29 | 0.0154 | 2.36 |
| A0A480NH91 | ENO1         | alpha-enolase isoform X1                               | 5 | 31.91 | 0.0065 | 1.71 |
| A0A480SKP2 | CNDP2        | cytosolic non-specific dipeptidase isoform X1          | 5 | 38.86 | 0.0060 | 1.66 |
| F1SQ09     | LUM          | lumican precursor                                      | 5 | 23.10 | 0.0171 | 2.01 |

|            |          |                                                                                   |   |       |        |          |
|------------|----------|-----------------------------------------------------------------------------------|---|-------|--------|----------|
| A0A5G2RBV3 | UMPS     | uridine 5'-monophosphate synthase                                                 | 4 | 18.85 | 0.0006 | 2.70     |
| A0A480IL99 | PSMC2    | 26S proteasome regulatory subunit 7                                               | 4 | 15.85 | 0.0008 | 2.60     |
| A0A480PM54 | PRPSAP2  | phosphoribosyl pyrophosphate synthase-associated protein 2 isoform X1             | 4 | 21.53 | 0.0034 | 1.95     |
| F1SGL4     | BBOX1    | gamma-butyrobetaine dioxygenase                                                   | 4 | 13.50 | 0.0061 | 5.07     |
| P82125     | AKR1E2   | 1,5-anhydro-D-fructose reductase isoform X1                                       | 4 | 16.27 | 0.0028 | 2.22     |
| A0A287AA45 | HNMT     | histamine N-methyltransferase                                                     | 4 | 16.26 | 0.0021 | 2.17     |
| P54612     | PPP2R1A  | serine/threonine-protein phosphatase 2A 65 kDa regulatory subunit A alpha isoform | 4 | 23.26 | 0.0257 | 1.71     |
| A0A4X1WBL9 | CCT4     | T-complex protein 1 subunit delta                                                 | 4 | 12.66 | 0.0029 | 2.19     |
| D0G0C8     | CCT2     | T-complex protein 1 subunit beta                                                  | 4 | 15.42 | 0.0042 | Infinity |
| Q29081     | PMVK     | phosphomevalonate kinase                                                          | 4 | 16.17 | 0.0059 | 3.43     |
| I3LM71     | IDO2     | indoleamine 2,3-dioxygenase 2 isoform X1                                          | 4 | 17.21 | 0.0131 | 3.70     |
| F2Z5J1     | PSMC1    | 26S proteasome regulatory subunit 4                                               | 4 | 17.93 | 0.0156 | 1.71     |
| A0A286ZI55 | GPD1     | glycerol-3-phosphate dehydrogenase [NAD(+)], cytoplasmic                          | 4 | 27.55 | 0.0021 | 2.28     |
| P79303     | UGP      | UTP-glucose-1-phosphate uridylyltransferase                                       | 4 | 27.17 | 0.0143 | 1.74     |
| A1XQU1     | PSMB7    | proteasome subunit beta type-7                                                    | 4 | 15.84 | 0.0091 | 2.77     |
| A0A4X1SUI4 | UFM1     | ubiquitin-fold modifier 1                                                         | 4 | 17.52 | 0.0074 | 2.03     |
| Q9GJT2     | ESD      | S-formylglutathione hydrolase                                                     | 4 | 23.89 | 0.0336 | 2.19     |
| A0A286ZTA4 | ALDOB    | fructose-bisphosphate aldolase B                                                  | 4 | 48.68 | 0.0475 | 1.52     |
| A0A8D1L3X4 | PRDX5    | peroxiredoxin-5, mitochondrial                                                    | 4 | 24.71 | 0.0003 | 3.65     |
| A0A4X1WCV0 | PPM1A    | protein phosphatase 1A                                                            | 4 | 16.00 | 0.0016 | 4.38     |
| P50447     | SERPINA1 | alpha-1-antitrypsin                                                               | 4 | 18.35 | 0.0006 | 1.75     |
| Q8SQ65     | CYP2C49  | cytochrome P450 2C18                                                              | 4 | 14.87 | 0.0080 | 4.00     |
| A0A4X1TW19 | PON1     | serum paraoxonase/arylesterase 1                                                  | 4 | 17.80 | 0.0079 | 2.35     |
| P0C5I2     | GMPPB    | mannose-1-phosphate guanylttransferase beta                                       | 4 | 26.40 | 0.0000 | 1.94     |
| A0A287AHB5 | CSAD     | cysteine sulfinic acid decarboxylase                                              | 4 | 16.46 | 0.0373 | 2.47     |
| A0A287B5Q7 | PSMD8    | 26S proteasome non-ATPase regulatory subunit 1                                    | 3 | 13.70 | 0.0028 | 1.84     |
| P60982     | DSTN     | destrin                                                                           | 3 | 11.69 | 0.0003 | 2.12     |
| A0A8D0NNP7 | ACTR2    | actin-related protein 2                                                           | 3 | 13.93 | 0.0251 | 2.46     |
| F1RXA7     | PSMD3    | 26S proteasome non-ATPase regulatory subunit 3                                    | 3 | 9.42  | 0.0019 | 2.11     |
| B3VMR0     | ATIC     | bifunctional purine biosynthesis protein ATIC                                     | 3 | 15.89 | 0.0078 | 3.26     |
| O77591     | IMPA1    | inositol monophosphatase 1                                                        | 3 | 11.50 | 0.0107 | 4.31     |
| P67937     | TPM4     | tropomyosin alpha-4 chain isoform X1                                              | 3 | 9.67  | 0.0396 | 1.50     |
| A0A4X1UPA0 | TPK1     | thiamin pyrophosphokinase 1                                                       | 3 | 22.47 | 0.0009 | 2.31     |
| A0A480SBA5 | PSMD13   | 26S proteasome non-ATPase regulatory subunit 13                                   | 3 | 13.48 | 0.0081 | 1.64     |
| A0A4X1UPZ8 | AACS     | acetoacetyl-CoA synthetase                                                        | 3 | 14.49 | 0.0096 | 2.67     |
| A0A1B2TT60 | CYP3A22  | cytochrome P450, subfamily IIIA, polypeptide 22                                   | 3 | 13.07 | 0.0002 | 25.37    |
| A0A4X1TKU2 | COPS4    | COP9 signalosome complex subunit 4                                                | 3 | 13.71 | 0.0024 | 2.24     |
| A0A8D0T416 | DPYSL2   | dihydropyrimidinase-related protein 2                                             | 3 | 11.51 | 0.0404 | Infinity |
| A0A480U2R8 | TIPRL    | TIP41-like protein                                                                | 3 | 14.49 | 0.0001 | 8.16     |
| Q8SQ26     | CRYL1    | lambda-crystallin homolog                                                         | 3 | 16.89 | 0.0388 | 2.09     |

|            |          |                                                                                   |   |       |        |       |
|------------|----------|-----------------------------------------------------------------------------------|---|-------|--------|-------|
| A0A4X1W5L4 | HSPG     | basement membrane-specific heparan sulfate proteoglycan core protein              | 3 | 11.80 | 0.0005 | 20.36 |
| A0A286ZTS1 | L3HYDPH  | trans-3-hydroxy-L-proline dehydratase                                             | 3 | 14.92 | 0.0000 | 4.24  |
| A7TX81     | COPS6    | COP9 signalosome complex subunit 6                                                | 3 | 10.52 | 0.0004 | 2.15  |
| P19205     | APEH     | acylamino-acid-releasing enzyme                                                   | 3 | 12.41 | 0.0025 | 2.09  |
| Q2EHH8     | PPP1CA   | serine/threonine-protein phosphatase PP1-alpha catalytic subunit                  | 3 | 14.06 | 0.0015 | 3.40  |
| A0A480VN60 | SGTA     | small glutamine-rich tetratricopeptide repeat-containing protein alpha isoform X1 | 3 | 9.85  | 0.0112 | 5.97  |
| A0A4X1U7K3 | ARPC1A   | actin-related protein 2/3 complex subunit 1A                                      | 3 | 10.34 | 0.0014 | 2.31  |
| A0A4X1UUG9 | GALT     | galactose-1-phosphate uridylyltransferase                                         | 3 | 17.02 | 0.0101 | 1.59  |
| A0A480M761 | GLRX     | glutaredoxin-3                                                                    | 3 | 12.59 | 0.0010 | 3.84  |
| A0A480IRT3 | ASMTL    | N-acetylserotonin O-methyltransferase-like protein isoform X1                     | 3 | 10.24 | 0.0243 | 1.52  |
| A0A8D1H6A2 | UBE2L3   | ubiquitin-conjugating enzyme E2 L3                                                | 3 | 12.46 | 0.0036 | 1.80  |
| F2Z5C1     | ANXA5    | annexin A5                                                                        | 3 | 9.76  | 0.0020 | 3.79  |
| A0A4X1UY49 | PSMA4    | proteasome subunit alpha type-4                                                   | 3 | 13.18 | 0.0056 | 1.74  |
| F1S850     | AS3MT    | arsenite methyltransferase isoform X1                                             | 3 | 14.07 | 0.0110 | 1.72  |
| Q29384     | PSMB4    | proteasome subunit beta type-4                                                    | 3 | 15.31 | 0.0238 | 2.38  |
| A0A8D1J8M3 | MVK      | mevalonate kinase                                                                 | 3 | 13.40 | 0.0231 | 1.86  |
| P52552     | PRDX2    | peroxiredoxin-2                                                                   | 3 | 16.06 | 0.0003 | 6.66  |
| A0A8D0I393 | HSD17B14 | 17-beta-hydroxysteroid dehydrogenase 14                                           | 3 | 23.39 | 0.0117 | 2.20  |
| F1RJH8     | ASL      | argininosuccinate lyase                                                           | 3 | 15.10 | 0.0077 | 1.75  |
| Q8MJ30     | QDPR     | dihydropteridine reductase                                                        | 3 | 12.43 | 0.0004 | 1.89  |
| Q5S1S4     | CA3      | carbonic anhydrase 3                                                              | 3 | 23.63 | 0.0218 | 2.19  |
| F2Z5K2     | PSMA5    | proteasome subunit alpha type-5                                                   | 3 | 14.77 | 0.0031 | 4.08  |
| Q6Q7J2     | GDI2     | rab GDP dissociation inhibitor beta                                               | 3 | 15.90 | 0.0125 | 2.08  |
| A0A287BM02 | HPF1     | ADP-ribosylation factor 1                                                         | 3 | 13.27 | 0.0458 | 1.51  |
| A0A4X1UL20 | PSMA2    | proteasome subunit alpha type-2                                                   | 3 | 15.72 | 0.0005 | 2.12  |
| A0A287A8X4 | PRMT5    | protein arginine N-methyltransferase 5                                            | 3 | 10.45 | 0.0000 | 3.69  |
| I3LJW2     | FGG      | fibrinogen gamma chain                                                            | 3 | 13.92 | 0.0476 | 3.13  |
| Q5G6V9     | CFL2     | cofilin-2                                                                         | 3 | 13.17 | 0.0001 | 2.99  |
| P83662     | ACMSD    | 2-amino-3-carboxymuconate-6-semialdehyde decarboxylase                            | 3 | 10.87 | 0.0193 | 3.57  |
| F2Z5J9     | RAB11B   | ras-related protein Rab-11B                                                       | 3 | 25.75 | 0.0016 | 2.85  |
| A0A480MAC3 | ARH3     | poly(ADP-ribose) glycohydrolase ARH3                                              | 3 | 13.96 | 0.0035 | 2.48  |
| A0A4X1VPX6 | PMM2     | phosphomannomutase 2                                                              | 3 | 8.25  | 0.0136 | 2.02  |
| P80895     | PCMT1    | protein-L-isoaspartate(D-aspartate) O-methyltransferase                           | 3 | 16.92 | 0.0284 | 2.17  |
| A0A8D0TL68 | GMPR2    | GMP reductase 2 isoform X1                                                        | 3 | 17.00 | 0.0001 | 1.70  |
| A0A287BPP9 | PSMB1    | proteasome subunit beta type-1                                                    | 3 | 10.64 | 0.0227 | 1.99  |
| A0A4X1T630 | HGD      | homogentisate 1,2-dioxygenase                                                     | 3 | 15.91 | 0.0072 | 64.13 |
| F1RTV1     | PPAT     | amidophosphoribosyltransferase                                                    | 3 | 8.82  | 0.0105 | 2.53  |
| A0A8D2A136 | NMRK1    | nicotinamide riboside kinase 1                                                    | 3 | 11.20 | 0.0001 | 1.97  |
| A0A480Y306 | GMPR     | GMP reductase 1                                                                   | 3 | 12.94 | 0.0044 | 2.22  |
| A0A8D1KUM5 | PUDP     | pseudouridine-5'-phosphatase                                                      | 2 | 7.52  | 0.0019 | 1.96  |

|            |              |                                                               |   |       |        |          |
|------------|--------------|---------------------------------------------------------------|---|-------|--------|----------|
| A0A8D1ET23 | FN1          | fibronectin                                                   | 2 | 9.76  | 0.0011 | 102.35   |
| A0A286ZHZ3 | TSN          | translin                                                      | 2 | 13.07 | 0.0001 | 1.89     |
| Q06AV1     | NNMT         | nicotinamide N-methyltransferase                              | 2 | 9.24  | 0.0404 | Infinity |
| A0A8D0LLR0 | MTPN         | myotrophin                                                    | 2 | 14.43 | 0.0007 | 48.62    |
| A0A4X1VGT1 | OTUB1        | ubiquitin thioesterase OTUB1                                  | 2 | 8.01  | 0.0014 | 3.30     |
| F1RWJ5     | KPNB1        | importin subunit beta-1                                       | 2 | 13.52 | 0.0096 | 2.18     |
| A0A287B9M9 | EIF4G1       | eukaryotic translation initiation factor 4 gamma 1            | 2 | 5.77  | 0.0009 | 3.72     |
| A0A287ABP7 | COPS3        | COP9 signalosome complex subunit 3                            | 2 | 6.78  | 0.0001 | 2.16     |
| Q0PIT9     | NAXE         | NAD(P)H-hydrate epimerase precursor                           | 2 | 5.96  | 0.0397 | 1.80     |
| Q02038     | NLN          | neurolysin, mitochondrial                                     | 2 | 8.64  | 0.0001 | 2.81     |
| F1RGD9     | HARS1        | histidine--tRNA ligase, cytoplasmic                           | 2 | 8.14  | 0.0000 | 2.60     |
| P81693     | ACP1         | low molecular weight phosphotyrosine protein phosphatase      | 2 | 14.49 | 0.0000 | 1.69     |
| A0A480I1S7 | FGGY         | FGGY carbohydrate kinase domain-containing protein isoform X1 | 2 | 8.81  | 0.0136 | 3.10     |
| I3LAT6     | IARS1        | isoleucine--tRNA ligase, cytoplasmic isoform X1               | 2 | 7.31  | 0.0119 | 19.46    |
| A0A8D1KJM0 | LOC110257570 | TRPM8 channel-associated factor 2-like                        | 2 | 7.24  | 0.0159 | 15.18    |
| A0A480VYA5 | NUDT9        | ADP-ribose pyrophosphatase, mitochondrial isoform X1          | 2 | 6.44  | 0.0171 | 12.31    |
| A0A4X1UWL1 | PFN1         | profilin-1                                                    | 2 | 10.52 | 0.0368 | 3.37     |
| A0A287A7V3 | HEXA         | beta-hexosaminidase subunit alpha                             | 2 | 7.00  | 0.0000 | Infinity |
| A0A8D0M3L7 | DPP2         | dipeptidyl peptidase 2 isoform X1                             | 2 | 9.82  | 0.0004 | 1979.33  |
| A0A287AAG0 | UAP1L1       | UDP-N-acetylhexosamine pyrophosphorylase-like protein 1       | 2 | 7.32  | 0.0032 | 2.23     |
| A0A4X1U5P7 | RAB18        | ras-related protein Rab-18                                    | 2 | 6.89  | 0.0040 | 2.56     |
| A0A8D0LZI3 | CSN2         | COP9 signalosome complex subunit 2                            | 2 | 4.55  | 0.0026 | 3.76     |
| A0A8D0WIM3 | GCK          | glucokinase                                                   | 2 | 7.81  | 0.0447 | 2.84     |
| A1YIZ1     | SEPHS2       | selenide, water dikinase 2                                    | 2 | 10.02 | 0.0043 | 3.63     |
| A0A8D1CE83 | TTC36        | tetratricopeptide repeat protein 36                           | 2 | 7.67  | 0.0042 | 2.02     |
| A0A287A021 | NUTF2        | nuclear transport factor 2                                    | 2 | 15.01 | 0.0009 | 2.60     |
| A0A8D1B579 | PPP1R7       | protein phosphatase 1 regulatory subunit 7                    | 2 | 8.23  | 0.0007 | 2.06     |
| Q9GJX5     | CYP4A21      | taurochenodeoxycholic 6 alpha-hydroxylase                     | 2 | 7.52  | 0.0432 | 2.31     |
| A0A481D833 | FTH1         | ferritin heavy chain isoform X1                               | 2 | 8.20  | 0.0227 | 1.70     |
| F1SB63     | TCP1         | T-complex protein 1 subunit alpha                             | 2 | 5.65  | 0.0017 | 1.88     |
| A0A8W4FQB3 | IDI1         | isopentenyl-diphosphate Delta-isomerase 1                     | 2 | 9.80  | 0.0426 | 23.67    |
| A0A8D1YQU9 | MTHFR        | methylenetetrahydrofolate reductase                           | 2 | 6.07  | 0.0043 | 50.86    |
| Q9GKX6     | GALM         | galactose mutarotase                                          | 2 | 11.02 | 0.0220 | 2.83     |
| A0A4X1TBE8 | GSTM3        | glutathione S-transferase                                     | 2 | 7.20  | 0.0077 | 6.11     |
| A0A8D0J2P5 | ACAT         | acetyl-CoA acetyltransferase, cytosolic                       | 2 | 15.87 | 0.0037 | 1.57     |
| A0A5K1UWY1 | GSTZ1        | maleylacetoacetate isomerase                                  | 2 | 15.04 | 0.0080 | 3.07     |
| A0A286ZV95 | TMED10       | transmembrane emp24 domain-containing protein 10              | 2 | 6.35  | 0.0089 | 1.65     |
| F1SSL6     | PSMA3        | proteasome subunit alpha type-3                               | 2 | 7.89  | 0.0009 | 2.03     |
| A0A286ZN52 | PSMB3        | proteasome subunit beta type-3                                | 2 | 10.24 | 0.0086 | 3.11     |
| P14332     | PGD          | 6-phosphogluconate dehydrogenase, decarboxylating             | 2 | 17.61 | 0.0169 | 31.57    |

|            |            |                                                             |   |       |        |          |
|------------|------------|-------------------------------------------------------------|---|-------|--------|----------|
| F1RG31     | HAGH       | hydroxyacylglutathione hydrolase, mitochondrial isoform X1  | 2 | 18.01 | 0.0031 | 2.59     |
| A0A480ZCU6 | SPR        | sepiapterin reductase                                       | 2 | 9.98  | 0.0190 | 2.08     |
| Q2EN76     | NME2       | nucleoside diphosphate kinase B                             | 2 | 9.39  | 0.0006 | 2.71     |
| I3LCU9     | CARHSP1    | calcium-regulated heat-stable protein 1                     | 2 | 6.69  | 0.0019 | 1.81     |
| P19133     | FTL        | ferritin light chain                                        | 2 | 13.96 | 0.0085 | 1.96     |
| A0A4X1UDT9 | IAH1       | isoamyl acetate-hydrolyzing esterase 1 homolog isoform X1   | 2 | 11.52 | 0.0011 | 1.84     |
| Q9GL51     | PAFAH1B1   | platelet-activating factor acetylhydrolase IB subunit alpha | 2 | 9.57  | 0.0014 | 2.04     |
| I3LCC2     | MARS1      | methionine--tRNA ligase, cytoplasmic                        | 2 | 10.43 | 0.0000 | Infinity |
| F1SK86     | FKBP4      | peptidyl-prolyl cis-trans isomerase FKBP4                   | 2 | 8.23  | 0.0000 | Infinity |
| A0A480NVY9 | ASRGL1     | isoaspartyl peptidase/L-asparaginase                        | 2 | 11.06 | 0.0027 | 2.31     |
| A0A4X1VSC7 | UFC1       | ubiquitin-fold modifier-conjugating enzyme 1                | 2 | 8.69  | 0.0004 | 4.15     |
| F1S1X3     | NARS1      | asparagine--tRNA ligase, cytoplasmic                        | 2 | 7.16  | 0.0129 | 2.72     |
| B3LDT2     | CTSZ       | cathepsin Z                                                 | 2 | 8.41  | 0.0167 | 1.96     |
| F1SGH9     | ACOX2      | peroxisomal acyl-coenzyme A oxidase 2                       | 2 | 15.14 | 0.0268 | 3.11     |
| A0A4X1UVQ7 | GCHFR      | GTP cyclohydrolase 1 feedback regulatory protein            | 2 | 10.60 | 0.0001 | 3.26     |
| A0A255VEC9 | coaBC      | phosphopantothenate--cysteine ligase isoform X1             | 2 | 5.42  | 0.0232 | 4.49     |
| A0A4X1SSI5 | GNPDA1     | glucosamine-6-phosphate isomerase 1                         | 2 | 7.05  | 0.0017 | 1.77     |
| A0A5G2QI52 | CPPED1     | serine/threonine-protein phosphatase CPPED1                 | 2 | 7.79  | 0.0055 | 1.74     |
| F1STK8     | C9H11orf54 | ester hydrolase C11orf54 homolog                            | 2 | 10.95 | 0.0025 | 5.90     |
| A0A8D1E909 | FKBP1A     | peptidyl-prolyl cis-trans isomerase FKBP1A                  | 2 | 8.85  | 0.0013 | 2.68     |
| Q007T2     | CDC42      | cell division control protein 42 homolog                    | 2 | 6.31  | 0.0234 | 1.79     |
| A0A5G2QX22 | UBA5       | ubiquitin-like modifier-activating enzyme 5                 | 2 | 5.91  | 0.0414 | 1.74     |
| A0A287BPG3 | NAGA       | alpha-N-acetylgalactosaminidase precursor                   | 2 | 8.44  | 0.0126 | 1.98     |
| Q9GMA6     | SERPINA3-2 | alpha-1-antichymotrypsin 2                                  | 2 | 7.99  | 0.0021 | 90.48    |

<sup>1</sup> Accession number in the UniProt database. <sup>2</sup> Matching peptides for each protein, used for quantitation. <sup>3</sup> SEQUEST score. The presence of the notation "Infinity" in the fold change column indicates the presence of the protein only in the NG samples.
