# Supplementary material for: Label-Free Quantitative Analysis of Pig Liver Proteome after Hepatitis E Virus Infection
Source: MDPI journal article supplement (doi:10.3390/v16030408), 2024-03-06
Supplement: s1 [file s1]

**Supplementary Table S1.** Proteins identified with greater abundance in samples obtained from pigs that suffered the HEV infection (PG) following label-free MS/MS analysis (Progenesis QI for proteomics).

| UniProt ID <sup>1</sup> | Gene name | Protein Description                                                 | Peptide <sup>2</sup> | Score <sup>3</sup> | Anova (p) | Fold change |
|-------------------------|-----------|---------------------------------------------------------------------|----------------------|--------------------|-----------|-------------|
| A0A481B0J7              | CPS1      | carbamoyl-phosphate synthase [ammonia], mitochondrial               | 78                   | 457.27             | 0.0049    | 2.04        |
| A0A8D1CLI4              | FLNA      | filamin-A isoform X2                                                | 27                   | 99.35              | 0.0010    | 2.12        |
| A0A480SKT5              | DMGDH     | dimethylglycine dehydrogenase, mitochondrial isoform X1             | 25                   | 125.00             | 0.0061    | 2.75        |
| A0A287ATN8              | HSPD1     | 60 kDa heat shock protein, mitochondrial                            | 24                   | 147.20             | 0.0039    | 1.98        |
| P42174                  | GLUD1     | glutamate dehydrogenase 1, mitochondrial                            | 23                   | 133.50             | 0.0007    | 2.01        |
| Q7YS28                  | PC        | pyruvate carboxylase, mitochondrial                                 | 23                   | 113.27             | 0.0033    | 10.54       |
| A0A4X1URZ5              | ACSS3     | acyl-CoA synthetase medium-chain family member 4                    | 22                   | 121.18             | 0.0017    | 2.01        |
| A0A480SA59              | SARDH     | sarcosine dehydrogenase, mitochondrial isoform X1                   | 22                   | 107.97             | 0.0004    | 2.96        |
| A0A287ADJ2              | HSPA9     | stress-70 protein, mitochondrial                                    | 20                   | 84.28              | 0.0001    | 2.50        |
| Q2XQV4                  | ALDH2     | aldehyde dehydrogenase, mitochondrial precursor                     | 18                   | 94.69              | 0.0026    | 1.78        |
| A0A4X1UM84              | PCK1      | phosphoenolpyruvate carboxykinase, cytosolic [GTP]                  | 18                   | 98.33              | 0.0036    | 2.90        |
| P26234                  | VCL       | Vinculin                                                            | 18                   | 63.18              | 0.0007    | 2.28        |
| P0DTA4                  | PCCA      | propionyl-CoA carboxylase alpha chain, mitochondrial                | 18                   | 78.68              | 0.0025    | 1.98        |
| A0A8D1MNH9              | SPTAN1    | spectrin alpha chain, non-erythrocytic 1                            | 17                   | 65.06              | 0.0000    | 2.68        |
| P33198                  | IDH2      | isocitrate dehydrogenase, mitochondrial                             | 16                   | 66.34              | 0.0113    | 1.53        |
| P79384                  | PCCB      | propionyl-CoA carboxylase beta chain, mitochondrial precursor       | 16                   | 70.50              | 0.0173    | 1.63        |
| A0A8D1EFW2              | AGXT2     | alanine-glyoxylate aminotransferase 2, mitochondrial                | 16                   | 87.66              | 0.0012    | 1.98        |
| D0G0B3                  | ACAA2     | 3-ketoacyl-CoA thiolase, mitochondrial                              | 16                   | 99.47              | 0.0057    | 2.21        |
| A0A4X1UM84              | PCK1      | phosphoenolpyruvate carboxykinase, cytosolic [GTP]                  | 16                   | 94.81              | 0.0055    | 1.90        |
| A0A287BBX3              | NADK2     | NAD kinase 2, mitochondrial                                         | 16                   | 76.07              | 0.0016    | 1.98        |
| O19072                  | OTC       | ornithine transcarbamylase, mitochondrial                           | 15                   | 94.18              | 0.0012    | 2.04        |
| P50441                  | GATM      | glycine amidinotransferase, mitochondrial                           | 15                   | 92.88              | 0.0003    | 2.22        |
| A0A4X1V4W9              | HSDL2     | hydroxysteroid dehydrogenase-like protein 2                         | 15                   | 68.16              | 0.0003    | 2.69        |
| I3LJ48                  | EHHADH    | peroxisomal bifunctional enzyme                                     | 14                   | 61.42              | 0.0007    | 2.01        |
| A0A8D1GE69              | ACADSB    | short/branched chain specific acyl-CoA dehydrogenase, mitochondrial | 14                   | 80.79              | 0.0102    | 2.04        |
| A0A8D0XUW7              | ATP5F1B   | ATP synthase subunit beta, mitochondrial                            | 14                   | 65.54              | 0.0032    | 3.05        |
| A0A287AIP7              | ACSL1     | long-chain-fatty-acid--CoA ligase 1                                 | 13                   | 48.59              | 0.0061    | 1.73        |
| A0A4X1URZ5              | ACSS3     | acyl-CoA synthetase short-chain family member 3, mitochondrial      | 13                   | 55.80              | 0.0003    | 3.38        |
| P80229                  | SERPINB1  | leukocyte elastase inhibitor                                        | 12                   | 48.80              | 0.0026    | 3.98        |
| A0A287BLE0              | FLNB      | filamin-B                                                           | 12                   | 44.89              | 0.0023    | 2.03        |
| C0MHR2                  | CLTC      | clathrin heavy chain                                                | 12                   | 45.85              | 0.0218    | 2.28        |
| A0A8D1UET6              | TST       | thiosulfate sulfurtransferase                                       | 12                   | 75.14              | 0.0022    | 1.89        |
| A0A286ZND5              | PRDX1     | peroxiredoxin-1                                                     | 12                   | 60.03              | 0.0087    | 2.88        |

|            |         |                                                                  |    |       |        |       |
|------------|---------|------------------------------------------------------------------|----|-------|--------|-------|
| P80021     | ATP5F1A | ATP synthase subunit alpha, mitochondrial                        | 12 | 65.71 | 0.0066 | 2.73  |
| Q29554     | HADHA   | trifunctional enzyme subunit alpha, mitochondrial                | 11 | 44.65 | 0.0039 | 4.12  |
| F1RMF7     | GLYAT   | glycine N-acyltransferase                                        | 11 | 56.90 | 0.0150 | 1.58  |
| I3LP02     | ACAT1   | acetyl-CoA acetyltransferase, mitochondrial                      | 11 | 54.70 | 0.0119 | 1.87  |
| Q6UAQ8     | ETFB    | electron transfer flavoprotein subunit beta                      | 11 | 54.83 | 0.0067 | 2.04  |
| Q9XT00     | HSD17B8 | 3-hydroxyacyl-CoA dehydrogenase                                  | 11 | 85.09 | 0.0000 | 2.42  |
| F2Z5N5     | RPL26L1 | ceruloplasmin isoform X1                                         | 10 | 59.12 | 0.0027 | 2.46  |
| F1SAD9     | PDIA4   | protein disulfide-isomerase A4                                   | 10 | 36.38 | 0.0269 | 2.21  |
| P53590     | SUCLG2  | succinate-CoA ligase [GDP-forming] subunit beta, mitochondrial   | 10 | 58.96 | 0.0036 | 2.32  |
| B2ZF49     | HADHA   | enoyl-CoA hydratase, mitochondrial                               | 10 | 48.23 | 0.0102 | 1.89  |
| P00346     | MDH2    | malate dehydrogenase, mitochondrial                              | 10 | 63.15 | 0.0006 | 1.89  |
| A0A4X1UTH9 | IVD     | isovaleryl-CoA dehydrogenase, mitochondrial                      | 10 | 62.96 | 0.0032 | 2.02  |
| P41367     | ACADM   | medium-chain specific acyl-CoA dehydrogenase, mitochondrial      | 10 | 47.06 | 0.0003 | 2.85  |
| A0A8W4F721 | ALDH4A1 | delta-1-pyrroline-5-carboxylate dehydrogenase, mitochondrial     | 10 | 42.48 | 0.0035 | 1.93  |
| O02734     | HMGCS2  | hydroxymethylglutaryl-CoA synthase, mitochondrial                | 9  | 38.04 | 0.0030 | 12.50 |
| A0A8D1Q766 | ADH1    | alcohol dehydrogenase 1                                          | 9  | 35.98 | 0.0025 | 2.76  |
| A0A8D0Q9R1 | MTTP    | microsomal triglyceride transfer protein large subunit precursor | 9  | 27.18 | 0.0078 | 2.40  |
| A0A5G2QRE7 | ETFA    | electron transfer flavoprotein subunit alpha, mitochondrial      | 9  | 50.72 | 0.0116 | 2.01  |
| Q0Z8U2     | RPS3    | 40S ribosomal protein S3                                         | 8  | 27.35 | 0.0078 | 2.46  |
| A0A8D1VUA0 | HADHB   | trifunctional enzyme subunit beta, mitochondrial                 | 8  | 27.85 | 0.0065 | 4.76  |
| A0A480XQL7 | EIF4A2  | eukaryotic initiation factor 4A-II                               | 8  | 27.13 | 0.0140 | 1.76  |
| P81140     | GCDH    | glutaryl-CoA dehydrogenase, mitochondrial                        | 8  | 38.22 | 0.0094 | 2.69  |
| O46409     | APOA4   | apolipoprotein A-IV precursor                                    | 8  | 24.58 | 0.0063 | 24.87 |
| A0A5G2QNM8 | COPG1   | coatamer subunit gamma-1                                         | 8  | 25.80 | 0.0283 | 2.72  |
| Q6XGY2     | DECR    | 2,4-dienoyl-CoA reductase, mitochondrial                         | 8  | 34.16 | 0.0056 | 1.72  |
| P39092     | A1BG    | alpha-1B-glycoprotein                                            | 8  | 35.00 | 0.0049 | 2.11  |
| F6QA08     | PDIA3   | protein disulfide-isomerase A3                                   | 8  | 28.00 | 0.0270 | 1.57  |
| A0A480EI27 | AK2     | adenylate kinase 2, mitochondrial isoform X1                     | 8  | 35.00 | 0.0001 | 2.92  |
| F1SA74     | MTHFD1  | C-1-tetrahydrofolate synthase, cytoplasmic                       | 8  | 35.51 | 0.0015 | 1.71  |
| P79273     | ACADS   | short-chain specific acyl-CoA dehydrogenase, mitochondrial       | 8  | 38.78 | 0.0031 | 2.33  |
| Q8WNV7     | DHRS4   | dehydrogenase/reductase SDR family member 4                      | 8  | 34.08 | 0.0002 | 3.12  |
| Q29214     | RPLP0   | 60S acidic ribosomal protein P0                                  | 7  | 32.90 | 0.0131 | 2.73  |
| F2Z565     | SLC25A5 | ADP/ATP translocase 1                                            | 7  | 29.50 | 0.0289 | 2.55  |
| A0A5G2QPK4 | AK3     | GTP:AMP phosphotransferase AK3, mitochondrial                    | 7  | 32.94 | 0.0041 | 1.95  |
| P00889     | CS      | citrate synthase, mitochondrial                                  | 7  | 17.47 | 0.0012 | 2.04  |
| A0A481CYL0 | ACO1    | cytoplasmic aconitate hydratase                                  | 7  | 38.73 | 0.0050 | 1.53  |
| A0A480NVF8 | KRT8    | keratin, type II cytoskeletal 8                                  | 7  | 21.79 | 0.0040 | 7.38  |
| A0A480JGI4 | NCL     | nucleolin                                                        | 7  | 23.69 | 0.0001 | 4.71  |
| A0A480I6I0 | COL14A1 | collagen alpha-1(XIV) chain isoform X1                           | 7  | 23.53 | 0.0052 | 2.02  |

|            |              |                                                                     |   |       |        |      |
|------------|--------------|---------------------------------------------------------------------|---|-------|--------|------|
| A0A8D1GJ40 | LOC100153899 | serpin A3-8                                                         | 7 | 22.59 | 0.0214 | 4.16 |
| P28491     | CALR         | calreticulin                                                        | 7 | 24.68 | 0.0100 | 1.84 |
| P00336     | LDHB         | L-lactate dehydrogenase B chain isoform X1                          | 7 | 46.22 | 0.0069 | 1.71 |
| A0A480XPR9 | BPHL         | valacyclovir hydrolase precursor                                    | 7 | 32.52 | 0.0094 | 1.80 |
| F1RUE3     | ALDH5A1      | succinate-semialdehyde dehydrogenase                                | 7 | 32.15 | 0.0044 | 1.92 |
| A0A8D0MNR5 | PECR         | peroxisomal trans-2-enoyl-CoA reductase                             | 6 | 42.25 | 0.0012 | 3.23 |
| I3LUP6     | NPM1         | nucleophosmin                                                       | 6 | 30.66 | 0.0000 | 3.17 |
| A0A8D1NUI3 | HOGA1        | 4-hydroxy-2-oxoglutarate aldolase, mitochondrial                    | 6 | 21.93 | 0.0027 | 6.38 |
| Q4GWZ2     | RPSA         | 40S ribosomal protein S2                                            | 6 | 20.05 | 0.0118 | 2.03 |
| P09623     | DLD          | dihydrolipoyl dehydrogenase, mitochondrial                          | 6 | 30.59 | 0.0006 | 3.23 |
| A0A4X1UNE1 | PPA2         | inorganic pyrophosphatase 2, mitochondrial                          | 6 | 20.20 | 0.0286 | 1.73 |
| A0A480RBI9 | RPL7         | 60S ribosomal protein L7                                            | 6 | 22.54 | 0.0046 | 2.87 |
| I3LLY3     | ACTN1        | alpha-actinin-1                                                     | 6 | 31.30 | 0.0075 | 1.84 |
| A0A2C9F3C0 | GUSB         | beta-glucuronidase precursor                                        | 6 | 31.85 | 0.0485 | 1.63 |
| A0A4X1SVF9 | POSTN        | periostin                                                           | 6 | 25.99 | 0.0044 | 2.85 |
| A0A4X1W1U6 | RPS4X        | 40S ribosomal protein S4, X isoform                                 | 6 | 14.98 | 0.0009 | 2.16 |
| Q6PLK3     | MAOB         | amine oxidase [flavin-containing] B                                 | 6 | 18.58 | 0.0122 | 3.21 |
| A0A480J4N2 | C4           | complement C4-A precursor                                           | 6 | 22.04 | 0.0118 | 2.47 |
| P00348     | HADH         | hydroxyacyl-coenzyme A dehydrogenase, mitochondrial                 | 6 | 33.60 | 0.0319 | 1.57 |
| Q29550     | CES1         | liver carboxylesterase                                              | 6 | 25.54 | 0.0050 | 1.91 |
| A0A4X1SK65 | RPS3A        | 40S ribosomal protein S3a                                           | 6 | 20.64 | 0.0114 | 2.47 |
| P00636     | FBP1         | fructose-1,6-bisphosphatase 1                                       | 6 | 28.59 | 0.0239 | 1.90 |
| A0A8D1ILU6 | PDIA4        | protein disulfide-isomerase                                         | 6 | 38.83 | 0.0075 | 1.81 |
| Q29387     | EEF1G        | elongation factor 1-gamma                                           | 6 | 30.22 | 0.0087 | 3.61 |
| P80147     | ABAT         | 4-aminobutyrate aminotransferase, mitochondrial                     | 6 | 28.76 | 0.0193 | 2.02 |
| A0A4X1UEN5 | HSPA5        | 78 kDa glucose-regulated protein                                    | 6 | 22.07 | 0.0315 | 2.11 |
| P28768     | SOD2         | superoxide dismutase [Mn], mitochondrial                            | 6 | 34.21 | 0.0197 | 1.86 |
| A0A8D0X3H3 | ACAD8        | isobutyryl-CoA dehydrogenase, mitochondrial                         | 6 | 22.23 | 0.0052 | 2.18 |
| Q29024     | DDX39B       | spliceosome RNA helicase DDX39B                                     | 5 | 20.28 | 0.0002 | 2.53 |
| F1SKG5     | GK           | glycerol kinase                                                     | 5 | 16.88 | 0.0052 | 1.62 |
| A0A287BKR2 | SHMT2        | serine hydroxymethyltransferase                                     | 5 | 18.10 | 0.0003 | 2.37 |
| A0A4X1U498 | HNRNPA2B1    | heterogeneous nuclear ribonucleoproteins A2/B1                      | 5 | 23.35 | 0.0002 | 4.84 |
| A0A4X1UTE2 | HNRNPK       | heterogeneous nuclear ribonucleoprotein K isoform X1                | 5 | 21.42 | 0.0017 | 2.07 |
| O19069     | SUCLG1       | succinate-CoA ligase [ADP/GDP-forming] subunit alpha, mitochondrial | 5 | 18.68 | 0.0001 | 2.30 |
| A0A287B177 | UGT1A6       | UDP glucuronosyltransferase 1 family, polypeptide A6                | 5 | 16.14 | 0.0092 | 2.92 |
| A0A4X1TIY7 | HSPB6        | heat shock protein beta-6                                           | 5 | 20.77 | 0.0006 | 8.10 |
| A0A4X1W965 | GLDC         | glycine dehydrogenase (decarboxylating), mitochondrial              | 5 | 25.06 | 0.0003 | 3.86 |
| A0A8D1ICB8 | GART         | trifunctional purine biosynthetic protein adenosine-3               | 5 | 20.74 | 0.0316 | 1.94 |
| A0A287A3Q5 | KARS1        | lysine tRNA ligase isoform X1                                       | 5 | 15.99 | 0.0008 | 1.86 |
| P63246     | RACK1        | receptor of activated protein C kinase 1                            | 5 | 25.21 | 0.0262 | 1.92 |
| P26042     | MSN          | moesin isoform X1                                                   | 5 | 18.73 | 0.0128 | 2.14 |

|            |              |                                                                                     |   |       |        |       |
|------------|--------------|-------------------------------------------------------------------------------------|---|-------|--------|-------|
| F1RYS9     | STBD1        | starch-binding domain-containing protein 1                                          | 5 | 20.28 | 0.0017 | 2.31  |
| I3L5K3     | HSD17B11     | estradiol 17-beta-dehydrogenase 11                                                  | 5 | 16.63 | 0.0246 | 1.79  |
| Q6WSP6     | HSPE1        | 10 kDa heat shock protein, mitochondrial                                            | 5 | 24.75 | 0.0030 | 2.03  |
| A0A8D1S7G0 | LOC100523213 | immunoglobulin lambda-like polypeptide 5                                            | 5 | 40.00 | 0.0029 | 1.93  |
| P00795     | CTSD         | cathepsin D                                                                         | 5 | 21.24 | 0.0002 | 1.81  |
| A0A8D1PXU5 | MSRA         | mitochondrial peptide methionine sulfoxide reductase                                | 5 | 25.10 | 0.0010 | 3.28  |
| Q29092     | HSP90B1      | endoplasmic                                                                         | 5 | 14.98 | 0.0064 | 1.89  |
| A0A4X1SUW3 | PRDX3        | thioredoxin-dependent peroxide reductase, mitochondrial                             | 5 | 18.11 | 0.0027 | 3.44  |
| A0A8W4F715 | NIPSNAP1     | protein NipSnap homolog 1                                                           | 5 | 27.34 | 0.0001 | 2.76  |
| P26044     | RDX          | radixin                                                                             | 5 | 21.61 | 0.0001 | 2.00  |
| F1SHU0     | HIBADH       | 3-hydroxyisobutyrate dehydrogenase, mitochondrial                                   | 5 | 42.92 | 0.0077 | 1.83  |
| A0A480YXQ8 | AASS         | alpha-aminoadipic semialdehyde synthase, mitochondrial                              | 5 | 24.92 | 0.0033 | 2.29  |
| Q29099     | PTBP1        | polypyrimidine tract-binding protein 1                                              | 4 | 17.48 | 0.0015 | 2.51  |
| K9J6J2     | STOM         | erythrocyte band 7 integral membrane protein                                        | 4 | 12.57 | 0.0046 | 3.20  |
| Q0QF01     | SDHA         | succinate dehydrogenase [ubiquinone] flavoprotein subunit, mitochondrial isoform X1 | 4 | 15.76 | 0.0082 | 2.64  |
| A0A8D0YSE2 | SNX5         | sorting nexin-5                                                                     | 4 | 12.32 | 0.0005 | 1.92  |
| Q8MI68     | MMUT         | methylmalonyl-CoA mutase, mitochondrial precursor                                   | 4 | 13.24 | 0.0307 | 1.84  |
| A0A5G2QHU0 | COPA         | coatamer subunit alpha                                                              | 4 | 12.76 | 0.0201 | 2.55  |
| Q9MZ16     | VDAC1        | voltage-dependent anion-selective channel protein 1                                 | 4 | 12.91 | 0.0237 | 4.89  |
| A0A480YTG3 | CALU         | calumenin isoform X2                                                                | 4 | 14.53 | 0.0018 | 2.41  |
| I3LP78     | RPL9         | 60S ribosomal protein L9 isoform X1                                                 | 4 | 15.58 | 0.0368 | 12.75 |
| A0A8D0VQ42 | ES1          | ES1 protein homolog, mitochondrial                                                  | 4 | 16.33 | 0.0030 | 4.02  |
| Q764M5     | STAT1        | signal transducer and activator of transcription 1                                  | 4 | 11.90 | 0.0426 | 2.70  |
| A0A5G2R8A9 | CPT2         | carnitine O-palmitoyltransferase 2, mitochondrial                                   | 4 | 12.82 | 0.0204 | 8.64  |
| A0A286ZZT0 | NNT          | NAD(P) transhydrogenase, mitochondrial                                              | 4 | 14.10 | 0.0319 | 47.44 |
| F1RWI8     | SCRN2        | secernin-2                                                                          | 4 | 19.44 | 0.0495 | 2.49  |
| Q29375     | RPL7A        | 60S ribosomal protein L7a                                                           | 4 | 13.39 | 0.0001 | 5.81  |
| A0A480Y2E3 | KNG1         | kininogen-1                                                                         | 4 | 15.24 | 0.0026 | 2.21  |
| A0A4X1VN86 | GANAB        | neutral alpha-glucosidase AB isoform X1                                             | 4 | 15.31 | 0.0109 | 2.73  |
| A0A8D0THT1 | SPTBN1       | spectrin beta chain, non-erythrocytic 1                                             | 4 | 18.49 | 0.0000 | 6.35  |
| A0A480KFK8 | GCAT         | 2-amino-3-ketobutyrate coenzyme A ligase, mitochondrial isoform X7                  | 4 | 16.91 | 0.0074 | 10.30 |
| D2SW95     | COPB1        | coatamer subunit beta                                                               | 4 | 17.79 | 0.0010 | 8.69  |
| Q29593     | TALDO1       | transaldolase                                                                       | 4 | 15.63 | 0.0038 | 1.68  |
| Q9BX68     | HINT2        | adenosine 5'-monophosphoramidase HINT2 isoform 1 precursor                          | 4 | 20.33 | 0.0007 | 2.08  |
| Q01105     | SET          | protein SET                                                                         | 4 | 18.59 | 0.0001 | 2.24  |
| F1SER1     | MAT1A        | S-adenosylmethionine synthase isoform type-1                                        | 4 | 13.66 | 0.0291 | 1.63  |
| L8B0S2     | IGHG         | IgG heavy chain precursor                                                           | 4 | 39.63 | 0.0081 | 1.65  |
| A0A4X1VUH0 | ECI1         | enoyl-CoA delta isomerase 1, mitochondrial                                          | 4 | 11.85 | 0.0154 | 1.72  |
| F1RUE0     | ACOT13       | acyl-coenzyme A thioesterase 13                                                     | 4 | 18.01 | 0.0036 | 4.33  |

|            |              |                                                            |   |       |        |       |
|------------|--------------|------------------------------------------------------------|---|-------|--------|-------|
| Q95342     | RPL18        | 60S ribosomal protein L18                                  | 4 | 14.42 | 0.0097 | 2.39  |
| A0A8D1JSH0 | ECH1         | delta(3,5)-Delta(2,4)-dienoyl-CoA isomerase, mitochondrial | 4 | 13.37 | 0.0040 | 2.21  |
| A0A4X1SP78 | ARCN1        | coatomer subunit delta                                     | 4 | 14.20 | 0.0065 | 1.64  |
| A0A287B6Y1 | RPL30        | 60S ribosomal protein L30                                  | 4 | 19.73 | 0.0032 | 3.01  |
| A0A4X1W9D1 | RPS8         | 40S ribosomal protein S8                                   | 4 | 13.94 | 0.0015 | 2.58  |
| P00258     | FDX1         | adrenodoxin, mitochondrial precursor                       | 4 | 13.55 | 0.0040 | 2.43  |
| Q29187     | RPL4         | 60S ribosomal protein L4                                   | 4 | 12.69 | 0.0016 | 3.14  |
| A0A4X1W4Q9 | HNRNPA1      | heterogeneous nuclear ribonucleoprotein A1                 | 4 | 18.15 | 0.0017 | 1.56  |
| I3L9C8     | ILK          | integrin-linked protein kinase                             | 3 | 10.92 | 0.0106 | 2.66  |
| A0A5G2R6M7 | SERPINB9     | serpin B9                                                  | 3 | 13.81 | 0.0304 | 2.22  |
| Q29308     | RPS19        | 40S ribosomal protein S19                                  | 3 | 7.44  | 0.0220 | 3.34  |
| Q95307     | RPL13A       | 60S ribosomal protein L13a                                 | 3 | 7.38  | 0.0049 | 3.31  |
| A0A4X1UXS0 | ADHFE1       | hydroxyacid-oxoacid transhydrogenase, mitochondrial        | 3 | 11.69 | 0.0103 | 2.17  |
| A0A480MCK5 | HNRNPF       | heterogeneous nuclear ribonucleoprotein F                  | 3 | 16.06 | 0.0021 | 2.43  |
| A0A8D1PHA0 | RPL19        | 60S ribosomal protein L19                                  | 3 | 9.59  | 0.0013 | 6.76  |
| Q95276     | RPL5         | 60S ribosomal protein L5                                   | 3 | 13.71 | 0.0003 | 5.32  |
| Q29293     | RPL30        | 60S ribosomal protein L3                                   | 3 | 10.64 | 0.0114 | 2.45  |
| A0A8D1QNX0 | BDH1         | D-beta-hydroxybutyrate dehydrogenase, mitochondrial        | 3 | 21.60 | 0.0061 | 7.16  |
| A0A287A9Y6 | RPS7         | 40S ribosomal protein S7                                   | 3 | 8.08  | 0.0032 | 3.91  |
| Q29201     | RPS9         | 40S ribosomal protein S9                                   | 3 | 6.91  | 0.0035 | 4.15  |
| A0A480UCK1 | ALDH16A1     | aldehyde dehydrogenase family 16 member A1                 | 3 | 11.08 | 0.0009 | 2.08  |
| A0A8D0N0I3 | SEPTIN7      | septin-7                                                   | 3 | 9.72  | 0.0210 | 3.36  |
| A0A8D1LUZ8 | PON3         | serum paraoxonase/lactonase 3 precursor                    | 3 | 16.53 | 0.0081 | 24.60 |
| P53027     | RPL10A       | 60S ribosomal protein L10a                                 | 3 | 7.47  | 0.0034 | 5.57  |
| A0A5G2R3H5 | USP5         | ubiquitin carboxyl-terminal hydrolase 5 isoform X1         | 3 | 11.84 | 0.0339 | 2.11  |
| A0A480QHS7 | CORO1A       | coronin-1A                                                 | 3 | 10.49 | 0.0343 | 2.42  |
| F1S4P6     | EIF3A        | eukaryotic translation initiation factor 3 subunit A       | 3 | 10.72 | 0.0227 | 2.30  |
| A0A287AZG0 | ARHGAP1      | rho GTPase-activating protein 1 isoform X1                 | 3 | 8.44  | 0.0409 | 27.79 |
| A0A8D1GR47 | CYP3A46      | cytochrome P450 family 3 subfamily A member 46             | 3 | 9.22  | 0.0199 | 34.31 |
| A0A480TM87 | RARS1        | arginine-tRNA ligase, cytoplasmic                          | 3 | 10.75 | 0.0083 | 7.19  |
| A0A4X1VIM6 | GLYCK        | glycerate kinase                                           | 3 | 13.57 | 0.0022 | 4.02  |
| A0A4X1SU77 | AMT          | aminomethyltransferase, mitochondrial                      | 3 | 10.63 | 0.0001 | 3.44  |
| P48819     | VTN          | vitronectin precursor                                      | 3 | 11.09 | 0.0003 | 2.93  |
| A0A480JHQ3 | EML4         | microtubule-associated protein 4 isoform X6                | 3 | 10.17 | 0.0322 | 3.32  |
| I3L920     | CORO1C       | coronin-1C                                                 | 3 | 7.83  | 0.0278 | 2.48  |
| A0A4X1SNP1 | RPL27A       | 60S ribosomal protein L27a                                 | 3 | 8.84  | 0.0019 | 3.17  |
| A0A287BJN5 | LOC100518644 | glycine N-acyltransferase-like isoform X1                  | 3 | 11.36 | 0.0002 | 1.88  |
| P79273     | ACADS        | short-chain specific acyl-CoA dehydrogenase, mitochondrial | 3 | 17.96 | 0.0036 | 2.43  |
| A0A8D0YLY5 | RPS18        | 40S ribosomal protein S18                                  | 3 | 7.70  | 0.0004 | 3.07  |
| A0A481DHP5 | RPS25        | 40S ribosomal protein S25                                  | 3 | 7.80  | 0.0012 | 2.34  |
| I3LC84     | SULT1C4      | sulfotransferase 1C4                                       | 3 | 8.99  | 0.0059 | 3.45  |

|            |              |                                                                                                                  |   |       |        |       |
|------------|--------------|------------------------------------------------------------------------------------------------------------------|---|-------|--------|-------|
| P14477     | FGB          | fibrinogen beta chain precursor                                                                                  | 3 | 15.05 | 0.0442 | 1.78  |
| A0A8D0IY26 | HMGCL        | hydroxymethylglutaryl-CoA lyase, mitochondrial                                                                   | 3 | 11.86 | 0.0417 | 1.58  |
| A0A4X1SG32 | LOC100155267 | histone H2B type 2-F                                                                                             | 3 | 9.76  | 0.0025 | 6.86  |
| A0A8D1RQX0 | HSD17B13     | 17-beta-hydroxysteroid dehydrogenase 13 isoform X1                                                               | 3 | 12.52 | 0.0408 | 2.14  |
| A0A2C9F366 | HSPB1        | heat shock protein beta-1                                                                                        | 3 | 25.90 | 0.0074 | 3.08  |
| A0A287AJ40 | GLYAL        | glycine N-phenylacetyltransferase                                                                                | 3 | 20.21 | 0.0003 | 2.54  |
| A0A287BJ05 | SEPTIN2      | septin-2                                                                                                         | 3 | 10.67 | 0.0062 | 2.13  |
| A0A480X9E7 | SEC13        | protein SEC13 homolog                                                                                            | 3 | 10.62 | 0.0125 | 2.68  |
| A0A4X1SG83 | RPL24        | 60S ribosomal protein L24                                                                                        | 3 | 7.44  | 0.0000 | 16.13 |
| I3L650     | CALD1        | caldesmon isoform X1                                                                                             | 3 | 11.24 | 0.0101 | 1.80  |
| Q9N0F1     | DLST         | dihydrolipoyllysine-residue succinyltransferase component of 2-oxoglutarate dehydrogenase complex, mitochondrial | 3 | 17.53 | 0.0026 | 3.32  |
| A0A8D0INC8 | PLS3         | plastin-3                                                                                                        | 3 | 16.05 | 0.0073 | 1.64  |
| A0A5C8H4Q8 | GALK         | galactokinase                                                                                                    | 3 | 9.40  | 0.0322 | 28.41 |
| A0A8D1NWL4 | SEPTIN11     | septin-11 isoform X1                                                                                             | 3 | 9.37  | 0.0015 | 2.21  |
| A0A4X1VFZ3 | RPS23        | 40S ribosomal protein S23                                                                                        | 3 | 12.23 | 0.0022 | 2.34  |
| A0A4X1T7J4 | ANP32A       | acidic leucine-rich nuclear phosphoprotein 32A                                                                   | 3 | 13.49 | 0.0000 | 2.56  |
| A0A480VE77 | RPL8         | 60S ribosomal protein L8                                                                                         | 3 | 7.73  | 0.0077 | 2.10  |
| A0A480SME4 | RPSA         | 40S ribosomal protein SA                                                                                         | 3 | 14.91 | 0.0026 | 2.70  |
| A0A8D1ABH5 | TXNDC5       | thioredoxin domain-containing protein 5                                                                          | 3 | 9.29  | 0.0403 | 1.66  |
| A0A8D0JDR5 | HNRNPA3      | heterogeneous nuclear ribonucleoprotein A3                                                                       | 3 | 16.16 | 0.0039 | 2.28  |
| A0A4X1TFR5 | RPS13        | 40S ribosomal protein S13                                                                                        | 3 | 7.13  | 0.0015 | 2.32  |
| A0A0K1TQS8 | UDPGST2B31   | UDP-glucuronosyltransferase 2B31 precursor                                                                       | 2 | 8.09  | 0.0412 | 6.10  |
| A0A480TXX4 | EIF3         | eukaryotic translation initiation factor 3 subunit F                                                             | 2 | 7.93  | 0.0124 | 2.15  |
| A0A287AEH0 | PSMD7        | 26S proteasome non-ATPase regulatory subunit 7                                                                   | 2 | 13.96 | 0.0018 | 4.06  |
| F1RW98     | RSU1         | ras suppressor protein 1 isoform 1                                                                               | 2 | 7.97  | 0.0334 | 2.40  |
| A0A480VHC2 | RPL37A       | 60S ribosomal protein L37a isoform X1                                                                            | 2 | 7.79  | 0.0088 | 3.89  |
| A0A8D1JF65 | ARPC1B       | actin-related protein 2/3 complex subunit 1B                                                                     | 2 | 4.63  | 0.0188 | 2.37  |
| A0A8D0J214 | VPS29        | vacuolar protein sorting-associated protein 29 isoform X1                                                        | 2 | 4.67  | 0.0126 | 2.13  |
| A0A287BRL8 | MARCKS       | myristoylated alanine-rich C-kinase substrate                                                                    | 2 | 9.93  | 0.0039 | 1.96  |
| O62786     | SLC2A2       | solute carrier family 2, glucose transporter member 2                                                            | 2 | 5.96  | 0.0012 | 12.32 |
| A0A480R697 | MATR3        | matrin-3 isoform X1                                                                                              | 2 | 7.39  | 0.0101 | 11.02 |
| P63221     | RPS21        | 40S ribosomal protein S21                                                                                        | 2 | 5.43  | 0.0042 | 5.11  |
| F1SI10     | RPL10L       | 60S ribosomal protein L10-like                                                                                   | 2 | 5.24  | 0.0346 | 2.67  |
| A0A4X1VRZ2 | RPL36        | 60S ribosomal protein L36                                                                                        | 2 | 5.81  | 0.0028 | 4.26  |
| P47788     | THOP1        | thimet oligopeptidase                                                                                            | 2 | 5.64  | 0.0213 | 1.78  |
| A0A0K1TQS8 | UDPGST2B31   | UDP-glucuronosyltransferase 2B31                                                                                 | 2 | 6.55  | 0.0307 | 2.22  |
| A0A286ZLH8 | RPL35A       | 60S ribosomal protein L35a                                                                                       | 2 | 4.92  | 0.0068 | 2.77  |
| A0A480SM35 | AHSA1        | activator of 90 kDa heat shock protein ATPase homolog 1                                                          | 2 | 5.79  | 0.0035 | 2.58  |
| A0A8D0LY87 | SEC23A       | protein transport protein Sec23A                                                                                 | 2 | 5.26  | 0.0022 | 1.69  |

|            |         |                                                                                    |   |       |        |          |
|------------|---------|------------------------------------------------------------------------------------|---|-------|--------|----------|
| A0A4X1VTJ6 | TIMM13  | mitochondrial import inner membrane translocase subunit Tim13                      | 2 | 7.37  | 0.0500 | 18.33    |
| A0A480XFY9 | CLYBL   | citrate lyase subunit beta-like protein, mitochondrial                             | 2 | 7.72  | 0.0004 | 2.86     |
| A0A5G2QLY5 | SND1    | staphylococcal nuclease domain-containing protein 1                                | 2 | 6.67  | 0.0004 | 214.34   |
| F1SH89     | CHDH    | choline dehydrogenase, mitochondrial                                               | 2 | 7.96  | 0.0272 | 5.21     |
| P14632     | LTF     | lactotransferrin                                                                   | 2 | 7.89  | 0.0064 | 3.69     |
| A0A4X1TBE8 | GSTM3   | glutathione S-transferase Mu 3                                                     | 2 | 7.25  | 0.0323 | 2.62     |
| A0A286ZQD0 | HIBCH   | 3-hydroxyisobutyryl-CoA hydrolase, mitochondrial                                   | 2 | 7.81  | 0.0385 | 2.33     |
| K9IWC7     | TRIM25  | E3 ubiquitin/ISG15 ligase TRIM25                                                   | 2 | 8.20  | 0.0184 | 33.38    |
| A0A480TXZ6 | EIF3I   | eukaryotic translation initiation factor 3 subunit I                               | 2 | 7.46  | 0.0012 | 4.28     |
| A0A287ACX4 | FKBP2   | peptidyl-prolyl cis-trans isomerase FKBP2                                          | 2 | 11.68 | 0.0331 | 2.60     |
| A0A287B773 | MCCC2   | methylcrotonoyl-CoA carboxylase beta chain, mitochondrial                          | 2 | 8.24  | 0.0003 | 9.53     |
| Q29381     | DDOST   | dolichyl-diphosphooligosaccharide-protein glycosyltransferase 48 kDa subunit       | 2 | 6.58  | 0.0193 | 7.46     |
| A0A0K1TQN0 | GSTA2   | glutathione S-transferase                                                          | 2 | 7.03  | 0.0320 | 29.29    |
| Q9GMB0     | RPN1    | dolichyl-diphosphooligosaccharide--protein glycosyltransferase subunit 1 precursor | 2 | 7.33  | 0.0000 | Infinity |
| P05207     | PRKAR2A | cAMP-dependent protein kinase type II-alpha regulatory subunit                     | 2 | 9.36  | 0.0004 | 5.57     |
| P55931     | ETFDH   | electron transfer flavoprotein-ubiquinone oxidoreductase, mitochondrial            | 2 | 6.60  | 0.0011 | 158.81   |
| A0A4X1SW13 | LDHD    | D-lactate dehydrogenase, mitochondrial                                             | 2 | 6.67  | 0.0097 | 29.53    |
| A0A4X1UIK2 | CYP27A1 | sterol 26-hydroxylase, mitochondrial                                               | 2 | 7.93  | 0.0327 | 20.65    |
| A0A8D1JE65 | TUFM    | elongation factor Tu, mitochondrial                                                | 2 | 8.07  | 0.0041 | 9.25     |
| Q6QRN9     | SLC25A6 | ADP/ATP translocase 3                                                              | 2 | 4.96  | 0.0115 | 31.43    |
| I3L7Y1     | RPL26L1 | 60S ribosomal protein L26                                                          | 2 | 5.65  | 0.0095 | 3.84     |
| A0A480X4F2 | VPS35   | vacuolar protein sorting-associated protein 35                                     | 2 | 4.01  | 0.0217 | 8.53     |
| A0A8X9AEI6 | ATP5F1C | ATP synthase subunit gamma, mitochondrial                                          | 2 | 6.13  | 0.0138 | 16.22    |
| A0A287B231 | UBQLN1  | ubiquilin-1                                                                        | 2 | 11.78 | 0.0037 | 3.29     |
| A0A480L247 | AFMID   | kynurenine formamidase                                                             | 2 | 11.40 | 0.0358 | 4.19     |
| A0A480QMH4 | HNRNP   | heterogeneous nuclear ribonucleoprotein A/B                                        | 2 | 4.47  | 0.0374 | 11.01    |
| A0A480T023 | C8A     | complement component C8 alpha chain precursor                                      | 2 | 5.91  | 0.0419 | 2.57     |
| A0A5G2QD80 | DCTN2   | dynactin subunit 2 isoform X1                                                      | 2 | 4.39  | 0.0296 | 5.04     |
| P16164     | UOX     | uricase precursor                                                                  | 2 | 5.45  | 0.0053 | 6.80     |
| A0A287BQZ1 | HAO2    | 2-Hydroxyacid oxidase 1                                                            | 2 | 5.73  | 0.0045 | 1.59     |
| A0A287APN0 | CSRP1   | cysteine and glycine-rich protein 1                                                | 2 | 11.45 | 0.0195 | 1.68     |
| A0A4X1TJ4  | ARPC5   | actin-related protein 2/3 complex subunit 5                                        | 2 | 8.37  | 0.0453 | 1.87     |
| P27917     | APOC3   | apolipoprotein C-III                                                               | 2 | 8.53  | 0.0019 | 7.79     |
| P27485     | RBP4    | retinol-binding protein 4                                                          | 2 | 5.79  | 0.0008 | 2.24     |
| P62831     | RPL23   | 60S ribosomal protein L23                                                          | 2 | 8.64  | 0.0219 | 2.34     |
| A0A287BAK0 | RPS24   | 40S ribosomal protein S24                                                          | 2 | 7.71  | 0.0062 | 2.32     |
| A0A8D0HP58 | PHYHD1  | phytanoyl-CoA dioxygenase domain-containing protein 1                              | 2 | 8.73  | 0.0029 | 17.28    |
| A0A287BFY0 | ALDOA   | fructose-bisphosphate aldolase A                                                   | 2 | 6.49  | 0.0005 | 2.01     |

|            |              |                                                                           |   |       |        |         |
|------------|--------------|---------------------------------------------------------------------------|---|-------|--------|---------|
| A1E295     | CATSB        | cathepsin B                                                               | 2 | 8.67  | 0.0089 | 2.64    |
| Q28960     | CBR1         | carbonyl reductase [NADPH] 1                                              | 2 | 8.23  | 0.0353 | 1.53    |
| A0A5G2QBQ4 | PRDX4        | peroxiredoxin-4                                                           | 2 | 12.21 | 0.0188 | 2.01    |
| A0A4X1TSU2 | ALDOC        | fructose-bisphosphate aldolase C                                          | 2 | 7.25  | 0.0347 | 2.66    |
| Q29550     | CES1         | liver carboxylesterase precursor                                          | 2 | 8.72  | 0.0010 | 2.10    |
| A0A8D1GJ40 | LOC100153899 | serpin A3-8                                                               | 2 | 8.12  | 0.0005 | 1184.33 |
| A0A480KNE9 | ETHE1        | persulfide dioxygenase ETHE1, mitochondrial                               | 2 | 7.28  | 0.0038 | 2.36    |
| Q2YGT9     | RPL6         | 60S ribosomal protein L6                                                  | 2 | 5.05  | 0.0015 | 4.11    |
| A0A8D0LHS2 | RPS11        | 40S ribosomal protein S11                                                 | 2 | 4.75  | 0.0062 | 2.51    |
| A0A8D0Q4H0 | RPL27A       | 60S ribosomal protein L27                                                 | 2 | 4.84  | 0.0037 | 3.99    |
| A0A480V1M7 | AP2B1        | AP-2 complex subunit beta                                                 | 2 | 8.87  | 0.0070 | 1.85    |
| Q6QAP7     | RPS17        | 40S ribosomal protein S17                                                 | 2 | 6.57  | 0.0004 | 2.47    |
| A0A8D1AFD3 | ANP32B       | acidic leucine-rich nuclear phosphoprotein 32B                            | 2 | 4.94  | 0.0002 | 7.45    |
| A0A4X1SYE3 | GCSH         | glycine cleavage system H protein, mitochondrial                          | 2 | 8.49  | 0.0001 | 2.77    |
| P62895     | CYC          | cytochrome c                                                              | 2 | 10.70 | 0.0160 | 1.83    |
| F2Z4Z1     | YWHAG        | 14-3-3 protein gamma                                                      | 2 | 12.22 | 0.0023 | 2.05    |
| A0A4X1WB36 | ECHDC2       | enoyl-CoA hydratase domain-containing protein 2, mitochondrial isoform X5 | 2 | 10.16 | 0.0009 | 3.21    |
| A0A8D0HZX2 | YWHAQ        | 14-3-3 protein theta                                                      | 2 | 9.32  | 0.0063 | 1.71    |
| D5KRL7     | RPS10        | 40S ribosomal protein S10                                                 | 2 | 7.53  | 0.0103 | 1.96    |
| P67985     | RPL22        | 60S ribosomal protein L22                                                 | 2 | 5.95  | 0.0229 | 2.14    |
| P49933     | NPG4         | protegrin-4                                                               | 2 | 7.00  | 0.0244 | 2.84    |
| P46405     | RPS12        | 40S ribosomal protein S12                                                 | 2 | 6.92  | 0.0013 | 2.74    |
| A0PFK7     | CAPZB        | F-actin-capping protein subunit beta                                      | 2 | 7.89  | 0.0005 | 1.77    |

<sup>1</sup> Accession number in the UniProt database; <sup>2</sup> Matching peptides for each protein, used for quantitation; <sup>3</sup> SEQUEST score; The presence of the notation "Infinity" in the fold change column indicates the presence of the protein only in the PG samples.
